# Supplementary material for: NiFe2O4@SiO2@ZrO2/SO42−/Cu/Co nanoparticles: a novel, efficient, magnetically recyclable and bimetallic catalyst for Pd-free Suzuki, Heck and C–N cross-coupling reactions in aqueous media
Source: Royal Society of Chemistry journal article supplement (doi:10.1039/d0nj06208a), 2021-01-01

## Supplementary materials

### NiFe<sub>2</sub>O<sub>4</sub>@SiO<sub>2</sub>@ZrO<sub>2</sub>/SO<sub>4</sub><sup>2-</sup>/Cu/Co Nanoparticles: A Novel Efficient, Magnetically Recyclable and Bimetallic Catalyst for Pd-Free Suzuki, Heck and C-N Cross-Coupling Reactions in aqueous media

Seyyedeh Ameneh Alavi G.,\* Mohammad Ali Nasserri, Milad Kazemnejadi, Ali Allahresani and Mahdi HussainZadeh

Department of Chemistry, Faculty of Sciences, University of Birjand, P. O. Box 97175-615, Birjand, Iran.

\* Corresponding author: Email: [Sa.alavi@birjand.ac.ir](mailto:Sa.alavi@birjand.ac.ir) (S. A. Alavi. G.)

#### <sup>1</sup>H NMR and <sup>13</sup>C NMR characterization data of the C-C and C-N cross-coupling products:

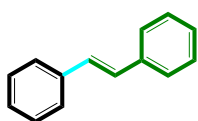

white solid, m.p. 124°C. <sup>1</sup>H NMR (300 MHz, CDCl<sub>3</sub>): δ (ppm): 7.13 (d, 2H), 7.31 – 7.42 (m, 6H), 7.52 – 7.68 (m, 4H); <sup>13</sup>C NMR (75 MHz, CDCl<sub>3</sub>): δ(ppm): 137.4, 128.8, 128.7, 127.6, 126.6. MS (m/e)= 180 [M<sup>+</sup>].[1].

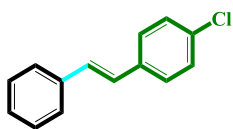

White solid, m.p. 128°C. <sup>1</sup>H NMR (300 MHz, CDCl<sub>3</sub>): δ (ppm): 7.06 (d, J = 16.2 Hz, 1H), 7.09 (d, J = 16.2 Hz, 1H), 7.29 (t, J = 7.5 Hz, 1H), 7.34 (d, J = 8.4 Hz, 2H), , 7.41 – 7.35 (m, 2H), 7.45 (d, J = 8.4 Hz, 2H), 7.52 (d, J = 7.8 Hz, 2H); <sup>13</sup>C NMR (75 MHz, CDCl<sub>3</sub>): δ(ppm): 137.0, 135.8, 133.1, 129.3, 128.8, 128.7, 127.8, 127.6, 127.3, 126.5. MS (m/e)= 214 [M<sup>+</sup>].[2].

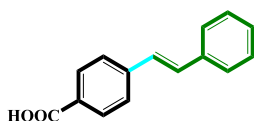

White solid, m.p. 251°C. <sup>1</sup>H NMR (300 MHz, CDCl<sub>3</sub>): δ (ppm): 7.15 (d, 2H), 7.31 – 7.63 (m, 5H), 7.73 (d, 2H), 7.95 (d, 2H), 12.91 (s, 1H); <sup>13</sup>C NMR (75 MHz, CDCl<sub>3</sub>): δ(ppm): 169.6, 141.4, 136.6, 130.9, 129.7, 129.4, 128.7, 128.2, 127.4, 126.8, 126.4. MS (m/e)= 224 [M<sup>+</sup>].[3].

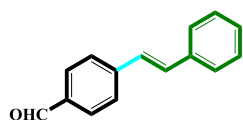

White solid, m.p. 112°C.  $^1\text{H}$  NMR (300 MHz,  $\text{CDCl}_3$ ):  $\delta$  (ppm): 7.10 (d, 2H), 7.23 – 7.59 (m, 5H), 7.68 (d, 2H), 7.87 (d, 2H), 10.89 (s, 1H);  $^{13}\text{C}$  NMR (75 MHz,  $\text{CDCl}_3$ ):  $\delta$ (ppm): 193.2, 136.2, 133.5, 129.7, 128.7, 127.9, 126.6, 125.7, 124.9, 124.6, 124.1. MS (m/e)= 208 [ $\text{M}^+$ ].[3].

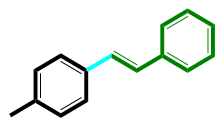

White solid, m.p. 118°C.  $^1\text{H}$  NMR (300 MHz,  $\text{CDCl}_3$ ):  $\delta$  (ppm): 2.26 (s, 3H), 6.91 – 7.64 (m, 9H);  $^{13}\text{C}$  NMR (75 MHz,  $\text{CDCl}_3$ ):  $\delta$ (ppm): 137.5, 137.4, 134.5, 129.5, 128.62, 128.60, 127.8, 127.4, 126.4, 21.3. MS (m/e)= 194 [ $\text{M}^+$ ].[2].

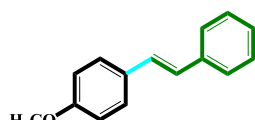

White solid, m.p. 133°C.  $^1\text{H}$  NMR (300 MHz,  $\text{CDCl}_3$ ):  $\delta$  (ppm): 3.77 (s, 3H), 6.80 (d,  $J = 8.5$  Hz, 2H), 6.89 (d,  $J = 16.5$  Hz, 1H), 6.99 (d,  $J = 16.0$  Hz, 1H), 7.18 (t,  $J = 6.5$  Hz, 1H), 7.28 (t,  $J = 7.5$  Hz, 2H), 7.37 (d,  $J = 8.5$  Hz, 2H), 7.42 (d,  $J = 7.5$  Hz, 2H) ppm;  $^{13}\text{C}$  NMR (75 MHz,  $\text{CDCl}_3$ ):  $\delta$ (ppm): 160.5, 138.8, 130.8, 128.9, 128.0, 127.6, 127.3, 126.6, 126.3, 117.0, 57.4. MS (m/e)= 210 [ $\text{M}^+$ ].[3].

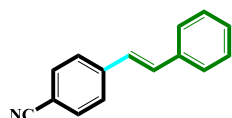

White solid, m.p. 116°C.  $^1\text{H}$  NMR (300 MHz,  $\text{CDCl}_3$ ):  $\delta$  (ppm): 7.02 (d,  $J = 16.5$  Hz, 1H), 7.45 – 7.60 (m, 6H), 7.49 (t,  $J = 7.5$  Hz, 2H), 7.40 (t,  $J = 7.45$  Hz, 1H), 7.20 (d,  $J = 16.5$  Hz, 1H);  $^{13}\text{C}$  NMR (75 MHz,  $\text{CDCl}_3$ ):  $\delta$ (ppm): 139.3, 136.8, 134.6, 120.2, 129.4, 128.9, 126.6, 127.9, 127.1, 126.4. MS (m/e)= 205 [ $\text{M}^+$ ].[4].

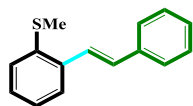

White solid, m.p. 132°C.  $^1\text{H}$  NMR (300 MHz,  $\text{CDCl}_3$ ):  $\delta$  (ppm): 3.70 (s, 3H), 6.78 (d,  $J = 8.7$  Hz, 1H), 6.90 (d,  $J = 10.7$  Hz, 1H), 7.00 – 7.38 (m, 9H);  $^{13}\text{C}$  NMR (75 MHz,  $\text{CDCl}_3$ ):  $\delta$ (ppm): 159.3, 137.8, 130.3, 128.5, 128.1, 127.6, 127.4, 126.6, 126.4, 115.2, 54.9. MS (m/e)= 226 [ $\text{M}^+$ ].[5].

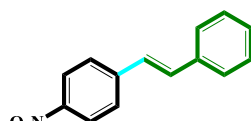

Yellow solid, m.p. 158°C.  $^1\text{H}$  NMR (300 MHz,  $\text{CDCl}_3$ ):  $\delta$  (ppm): 7.23 (d,  $J = 16.5$  Hz, 1H), 7.37 (d,  $J = 16$  Hz, 1H), 7.45 – 7.55 (m, 3H), 7.71 (d,  $J = 7.3$  Hz, 2H), 7.80 (d,  $J = 9.3$  Hz,

2H), 8.40 (d,  $J = 9.3$  Hz, 2H);  $^{13}\text{C}$  NMR (75 MHz,  $\text{CDCl}_3$ ):  $\delta(\text{ppm})$ : 152.2, 149.9, 140.7, 135.8, 130.4, 129.4, 128.8, 127.2, 125.9. MS (m/e)= 225 [ $\text{M}^+$ ].[2].

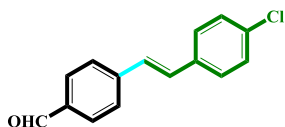

White solid, m.p. 110°C.  $^1\text{H}$  NMR (300 MHz,  $\text{CDCl}_3$ ):  $\delta$  (ppm): 7.15 (s, 2H), 7.34 – 7.25 (m, 2H), 7.37 – 7.43 (m, 1H), 7.52 – 7.59 (m, 2H), 7.71 – 7.83 (m, 2H), 8.03 – 8.01 (m, 1H), 10.05 (s, 1H);  $^{13}\text{C}$  NMR (75 MHz,  $\text{CDCl}_3$ ):  $\delta(\text{ppm})$ : 192.2, 138.6, 137.9, 136.9, 134.8, 132.5, 130.0, 129.5, 129.3, 129.1, 128.5, 128.1, 127.3, 126.5, 125.0. MS (m/e)= 242 [ $\text{M}^+$ ].[1].

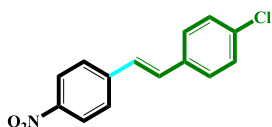

Yellow solid, m.p. 122°C.  $^1\text{H}$  NMR (300 MHz,  $\text{CDCl}_3$ ):  $\delta$  (ppm): 7.24 (d, 1H), 7.21 – 7.37 (m, 3H), 7.55 (d,  $J = 7.3$  Hz, 2H), 7.62 (d,  $J = 8.8$  Hz, 2H), 8.21 (d,  $J = 8.7$  Hz, 2H);  $^{13}\text{C}$  NMR (75 MHz,  $\text{CDCl}_3$ ):  $\delta(\text{ppm})$ : 146.8, 143.9, 136.2, 133.3, 128.9, 128.9, 127.1, 126.9, 126.3, 124.2. MS (m/e)= 259 [ $\text{M}^+$ ].[1].

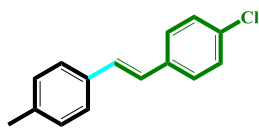

White solid, m.p. 59°C.  $^1\text{H}$  NMR (300 MHz,  $\text{CDCl}_3$ ):  $\delta$  (ppm): 7.42 (t,  $J = 5.6$  Hz, 2H), 7.31 – 7.43 (m, 2H), 7.23 – 7.31 (m, 2H), 7.18 (t,  $J = 10.0$  Hz, 2H), 7.06 (d,  $J = 16.3$  Hz, 1H), 7.00 (d,  $J = 16.3$  Hz, 1H), 2.37 (d,  $J = 4.5$  Hz, 3H);  $^{13}\text{C}$  NMR (75 MHz,  $\text{CDCl}_3$ ):  $\delta(\text{ppm})$ : 137.8, 136.0, 134.2, 132.9, 129.4, 129.2, 128.8, 127.5, 126.4, 126.3, 21.3. MS (m/e)= 228 [ $\text{M}^+$ ].[1].

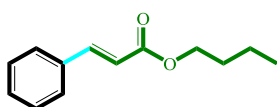

Colorless oil.  $^1\text{H}$  NMR (300 MHz,  $\text{CDCl}_3$ ):  $\delta$  (ppm): 0.90 (t,  $J = 7.5$  Hz, 3H), 1.37 – 1.42 (m, 2H), 1.65 – 1.69 (m, 2H), 4.17 (t,  $J = 6.7$  Hz, 2H), 6.53 (d,  $J = 16$  Hz, 1H), 7.60 (d,  $J = 8.7$  Hz, 2H), 7.63 (d,  $J = 16.2$  Hz, 1H), 8.18 (d,  $J = 8.7$  Hz, 2H);  $^{13}\text{C}$  NMR (75 MHz,  $\text{CDCl}_3$ ):  $\delta(\text{ppm})$ : 166.0, 141.5, 140.5, 128.5, 124.1, 122.6, 64.8, 30.6, 19.1, 13.7. MS (m/e)= 204 [ $\text{M}^+$ ].[6].

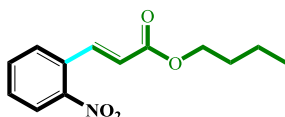

Yellow solid, m.p. 62°C.  $^1\text{H}$  NMR (300 MHz,  $\text{CDCl}_3$ ):  $\delta$  (ppm): 0.88 (t,  $J = 7.5$  Hz, 3H), 1.35 – 1.40 (m, 2H), 1.62 – 1.66 (m, 2H), 4.14 (t,  $J = 7.5$  Hz, 2H), 6.29 (d,  $J = 17.5$  Hz, 1H), 7.42 – 7.57 (m, 2H), 7.94 – 7.97 (m, 2H), 8.02 (d,  $J = 17.5$  Hz, 1H);  $^{13}\text{C}$  NMR (75 MHz,  $\text{CDCl}_3$ ):  $\delta(\text{ppm})$ : 165.9, 148.2, 139.7, 133.5, 130.3, 130.2, 129.2, 124.6, 123.3, 64.7, 30.6, 19.1, 13.9. MS (m/e)= 249 [ $\text{M}^+$ ].[6].

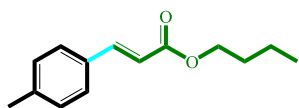

Colorless oil.  $^1\text{H NMR}$  (300 MHz,  $\text{CDCl}_3$ ):  $\delta$  (ppm): 0.85 (t,  $J = 4.7$  Hz, 3H), 1.32 – 1.36 (m, 2H), 1.56 – 1.59 (m, 2H), 2.24 (s, 3H), 4.09 (t,  $J = 5.0$  Hz, 2H), 6.30 (dd,  $J = 16.0$  Hz,  $J' = 5.9$  Hz, 1H), 7.06 – 7.1 (m, 2H), 7.29 – 7.31 (m, 2H), 7.52 (dd,  $J = 18.2$  Hz,  $J' = 5.5$  Hz, 1H);  $^{13}\text{C NMR}$  (75 MHz,  $\text{CDCl}_3$ ):  $\delta$ (ppm): 167.2, 144.5, 140.5, 131.7, 129.5, 128.3, 117.1, 64.2, 30.8, 21.4, 19.2, 13.7. MS (m/e)= 218 [ $\text{M}^+$ ].[6].

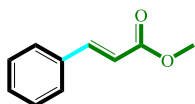

White solid, m.p.  $38^\circ\text{C}$ .  $^1\text{H NMR}$  (300 MHz,  $\text{CDCl}_3$ ):  $\delta$  (ppm): 3.84 – 3.71 (m, 3H), 6.45 (dd,  $J = 25.2, 16.6$  Hz, 1H), 7.39 (d,  $J = 22.4$  Hz, 3H), 7.53 (d, 2H,  $J = 20.8$  Hz), 7.71 (dd,  $J = 25.2, 16.0$  Hz, 1H);  $^{13}\text{C NMR}$  (75 MHz,  $\text{CDCl}_3$ ):  $\delta$ (ppm): 166.9, 144.7, 131.2, 131.4, 131.9, 117.8, 53.4. MS (m/e)= 162 [ $\text{M}^+$ ].[7].

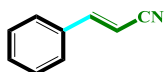

Clear colorless liquid, m.p.  $17^\circ\text{C}$ .  $^1\text{H NMR}$  (300 MHz,  $\text{CDCl}_3$ ):  $\delta$  (ppm): 5.88 (d, 1H,  $J = 16.8$  Hz), 7.26 (s, 1H), 7.36 – 7.44 (m, 5H);  $^{13}\text{C NMR}$  (75 MHz,  $\text{CDCl}_3$ ):  $\delta$ (ppm): 151.7, 129.4, 128.6, 128.4, 135.5, 117.6, 96.3. MS (m/e)= 129 [ $\text{M}^+$ ].[1].

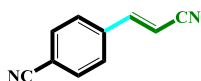

Light brown solid, m.p.  $74^\circ\text{C}$ .  $^1\text{H NMR}$  (300 MHz,  $\text{CDCl}_3$ ):  $\delta$  (ppm): 7.10-7.16 (d,  $J = 16.3$  Hz, 1H), 7.23-7.28 (d,  $J = 16.3$  Hz, 1H), 7.30-7.36 (t, 2H), 7.52-7.55 (d, 2H), 7.53-7.62 (q, 4H);  $^{13}\text{C NMR}$  (75 MHz,  $\text{CDCl}_3$ ):  $\delta$ (ppm): 141.9, 136.3, 132.5, 132.4, 128.9, 128.7, 126.9, 126.9, 126.8, 119.0, 110.6. MS (m/e)= 154 [ $\text{M}^+$ ].[1].

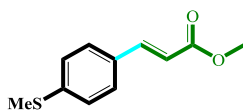

Yellow solid, m.p.  $49^\circ\text{C}$ .  $^1\text{H NMR}$  (300 MHz,  $\text{CDCl}_3$ ):  $\delta$  (ppm): 3.30 (s, 3H), 3.82 (s, 3H), 6.41 (d,  $J = 16.0$  Hz, 1H), 7.22 (d,  $J = 8.0$  Hz, 2H), 7.42 (d,  $J = 8.0$  Hz, 2H), 7.70 (d,  $J = 16.0$  Hz, 1H);  $^{13}\text{C NMR}$  (75 MHz,  $\text{CDCl}_3$ ):  $\delta$ (ppm): 168.2, 145.7, 141.6, 132.4, 130.5, 128.6, 118.4, 52.8, 21.9. MS (m/e)= 208 [ $\text{M}^+$ ].[7].

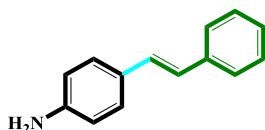

White solid, m.p.  $153^\circ\text{C}$ .  $^1\text{H NMR}$  (300 MHz,  $\text{CDCl}_3$ ):  $\delta$  (ppm): 3.74 (s, 2H), 6.68 (d,  $J = 8.4$  Hz, 2H), 6.93 (d,  $J = 16.4$  Hz, 1H), 7.03 (d,  $J = 16.4$  Hz, 1H), 7.22 (t,  $J = 7.4$  Hz, 1H),

7.34 – 7.26 (m, 2H), 7.35 (s, 2H), 7.48 (d,  $J = 7.6$  Hz, 2H);  $^{13}\text{C}$  NMR (75 MHz,  $\text{CDCl}_3$ ):  $\delta(\text{ppm})$ : 146.1, 137.9, 128.7, 128.6, 128.0, 127.7, 126.9, 126.1, 125.1, 115.2. MS (m/e)= 195 $[\text{M}^+]$ .[\[9\]](#).

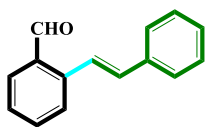

White solid, m.p. 77°C.  $^1\text{H}$  NMR (300 MHz,  $\text{CDCl}_3$ ):  $\delta$  (ppm): 7.15 (d,  $J = 16.3$  Hz, 1H), 7.28 (d,  $J = 16.3$  Hz, 1H), 7.32 – 7.42 (m, 3H), 7.56 (d,  $J = 7.2$  Hz, 2H), 7.66 (d,  $J = 7.7$  Hz, 2H), 7.88 (d,  $J = 7.7$  Hz, 2H), 10.0 (s, 1H);  $^{13}\text{C}$  NMR (75 MHz,  $\text{CDCl}_3$ ):  $\delta(\text{ppm})$ : 191.7, 143.7, 135.8, 135.3, 132.4, 130.5, 128.6, 128.1, 127.2, 126.4. MS (m/e)= 208 $[\text{M}^+]$ .[\[9\]](#).

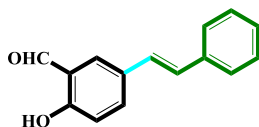

White solid, m.p. 188°C.  $^1\text{H}$  NMR (300 MHz,  $\text{CDCl}_3$ ):  $\delta$  (ppm): 7.09 (d,  $J = 16.3$  Hz, 1H), 7.23 (d,  $J = 16.3$  Hz, 1H), 7.26 – 7.42 (m, 3H), 7.53-7.66 (m, 5H), 10.9 (s, 1H), 15.8 (s, 1H);  $^{13}\text{C}$  NMR (75 MHz,  $\text{CDCl}_3$ ):  $\delta(\text{ppm})$ : 192.4, 163.2, 144.1, 135.9, 135.6, 1332.2, 130.9, 129.1, 128.7, 127.8, 126.8. MS (m/e)= 224 $[\text{M}^+]$ .[\[6\]](#).

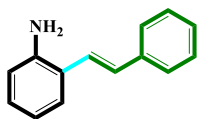

Pale pink solid, m.p. 107°C.  $^1\text{H}$  NMR (300 MHz,  $\text{CDCl}_3$ ):  $\delta$  (ppm): 3.65 (s, 2H), 6.20 – 6.33 (m, 1H), 6.71 – 6.81 (m, 1H), 6.95 (t,  $J = 14.4$  Hz, 1H), 7.02 – 7.14 (m, 2H), 7.13 (dd,  $J = 15.6$ , 7.6 Hz, 1H), 7.26 – 7.32 (m, 1H), 7.35 (dd,  $J = 7.2$ , 1.6 Hz, 2H), 8.38 – 7.49 (m, 2H);  $^{13}\text{C}$  NMR (75 MHz,  $\text{CDCl}_3$ ):  $\delta(\text{ppm})$ : 146.6, 138.4, 137.4, 129.6, 128.9, 128.6, 128.5, 127.5, 126.5, 117.3, 114.7, 112.9. MS (m/e)= 195 $[\text{M}^+]$ .[\[1\]](#).

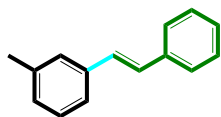

White solid, m.p. 42°C.  $^1\text{H}$  NMR (300 MHz,  $\text{CDCl}_3$ ):  $\delta$  (ppm): 2.35 (s, 3H), 7.07 (d, 2H), 7.13 – 7.15 (d,  $J = 7.9$  Hz, 2H), 7.22 – 7.26 (t,  $J = 7.3$  Hz, 1H), 7.36 – 7.39 (t,  $J = 7.6$  Hz, 2H), 7.40 – 7.46 (d,  $J = 7.5$  Hz, 2H), 7.42 – 7.44 (d,  $J = 8.0$  Hz, 2H);  $^{13}\text{C}$  NMR (75 MHz,  $\text{CDCl}_3$ ):  $\delta(\text{ppm})$ : 137.6, 137.5, 134.6, 129.4, 128.7, 127.7, 127.4, 126.5, 126.4, 21.3. MS (m/e)= 194 $[\text{M}^+]$ .[\[1\]](#).

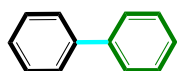

Colorless solid, m.p. 70°C.  $^1\text{H}$  NMR (300 MHz,  $\text{CDCl}_3$ ):  $\delta$  (ppm): 7.34 – 7.60 (m, 10H) ppm;  $^{13}\text{C}$  NMR (75 MHz,  $\text{CDCl}_3$ ):  $\delta(\text{ppm})$ : 141.3, 129.0, 127.3, 127.23. MS (m/e)= 154 $[\text{M}^+]$ .[\[12\]](#).

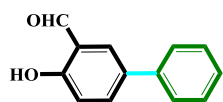

White solid, m.p. 100°C.  $^1\text{H NMR}$  (300 MHz,  $\text{CDCl}_3$ ):  $\delta$  (ppm): 7.31 – 7.36 (m, 3H), 7.57 (dd,  $J = 4.4, 2.5$  Hz, 2H), 7.68 (d,  $J = 6.8$  Hz, 2H), 7.87 (d,  $J = 6.8$  Hz, 2H), 10.03 (s, 1H);  $^{13}\text{C NMR}$  (75 MHz,  $\text{CDCl}_3$ ):  $\delta$ (ppm): 198.3, 161.5, 145.5, 136.6, 134.8, 133.1, 132.5, 127.5, 127.3, 130.3, 127.8, 121.3. MS (m/e)= 198[ $\text{M}^+$ ].[12].

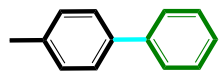

White solid, m.p. 49°C.  $^1\text{H NMR}$  (300 MHz,  $\text{CDCl}_3$ ):  $\delta$  (ppm): 2.44 (s, 3H), 7.27 – 7.55 (m, 7H), 7.62 – 7.74 (m, 2H) ppm;  $^{13}\text{C NMR}$  (75 MHz,  $\text{CDCl}_3$ ):  $\delta$ (ppm): 141.2, 138.6, 137.1, 129.6, 129.0, 127.4, 127.1, 127.0, 21.1. MS (m/e)= 168[ $\text{M}^+$ ].[10].

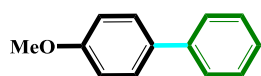

Light yellow solid, m.p. 86°C.  $^1\text{H NMR}$  (300 MHz,  $\text{CDCl}_3$ ):  $\delta$  (ppm): 3.85 (s, 3H), 6.98 (d,  $J = 7.5$  Hz, 2H), 7.28 (t,  $J = 7.2$  Hz, 2H), 7.41 (t,  $J = 7.2$  Hz, 2H), 7.51 – 7.57 (m, 3H) ppm;  $^{13}\text{C NMR}$  (75 MHz,  $\text{CDCl}_3$ ):  $\delta$ (ppm): 160.1, 142.9, 141.2, 129.9, 128.9, 127.5, 127.3, 119.8, 113.6, 112.3, 100.0, 55.4. MS (m/e)= 184[ $\text{M}^+$ ].[8].

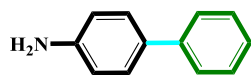

Brown solid, m.p. 103°C.  $^1\text{H NMR}$  (300 MHz,  $\text{CDCl}_3$ ):  $\delta$  (ppm): 3.54 (s, 2H), 6.66 (d,  $J = 7.8$  Hz, 2H), 7.32 (d,  $J = 7.1$  Hz, 1H), 7.42 (d,  $J = 8.7$  Hz, 2H), 7.46 (s, 2H), 7.59 (d,  $J = 7.8$  Hz, 2H);  $^{13}\text{C NMR}$  (75 MHz,  $\text{CDCl}_3$ ):  $\delta$ (ppm): 146.7, 133.4, 131.3, 127.7, 124.0, 114.8, 112.7, 90.1, 87.4. MS (m/e)= 169[ $\text{M}^+$ ].[10].

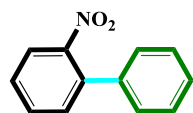

Yellow solid, m.p. 37°C.  $^1\text{H NMR}$  (300 MHz,  $\text{CDCl}_3$ ):  $\delta$  (ppm): 7.45 – 7.76 (m, 7H), 8.31 (d,  $J = 9.0$  Hz, 2H);  $^{13}\text{C NMR}$  (75 MHz,  $\text{CDCl}_3$ ):  $\delta$ (ppm): 150.0, 148.8, 140.2, 133.2, 130.2, 128.1, 124.4, 123.5, 122.3. MS (m/e)= 199[ $\text{M}^+$ ].[11].

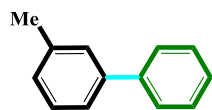

Colorless liquid, m.p. 4°C.  $^1\text{H NMR}$  (300 MHz,  $\text{CDCl}_3$ ):  $\delta$  (ppm): 2.40 (s, 3H), 7.27 (d,  $J = 8$  Hz, 2H), 7.35 (t,  $J = 8$  Hz, 1H), 7.42 (d,  $J = 8$  Hz, 2H), 7.45 (t,  $J = 8$  Hz, 2H), 7.60 (d,  $J = 8$  Hz, 2H);  $^{13}\text{C NMR}$  (75 MHz,  $\text{CDCl}_3$ ):  $\delta$ (ppm): 148.9, 140.3, 138.9, 133.0, 130.3, 130.1, 129.0, 128.3, 123.3, 122.1, 22.7. MS (m/e)= 168[ $\text{M}^+$ ].[11].

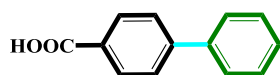

White solid, m.p. 220°C.  $^1\text{H}$  NMR (300 MHz,  $\text{CDCl}_3$ ):  $\delta$  (ppm): 7.43 – 7.55 (m, 5H), 7.60 – 7.68 (m, 1H), 7.75 – 7.85 (m, 2H), 8.56 – 8.58 (m, 1H), 13.65 (broad, 1H);  $^{13}\text{C}$  NMR (75 MHz,  $\text{CDCl}_3$ ):  $\delta$ (ppm): 167.5, 141.9, 137.2, 132.9, 130.5, 129.6, 122.1. MS (m/e)= 198[ $\text{M}^+$ ].[11].

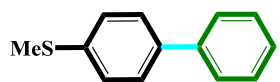

White solid, m.p. 72°C.  $^1\text{H}$  NMR (300 MHz,  $\text{CDCl}_3$ ):  $\delta$  (ppm): 3.85 (s, 3H), 6.98 (d,  $J = 8$  Hz, 2H), 7.33 (t,  $J = 8$  Hz, 1H), 7.44 (t,  $J = 8$  Hz, 2H), 7.51 – 7.57 (m, 4H);  $^{13}\text{C}$  NMR (75 MHz,  $\text{CDCl}_3$ ):  $\delta$ (ppm): 148.0, 136.7, 131.8, 128.6, 127.9, 121.4, 116.8, 112.8, 107.9, 105.6, 19.9. MS (m/e)= 200[ $\text{M}^+$ ].[12].

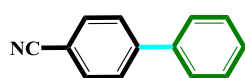

Light yellow solid, m.p. 80°C.  $^1\text{H}$  NMR (300 MHz,  $\text{CDCl}_3$ ):  $\delta$  (ppm): 7.53 – 7.42 (m, 3H), 7.59 (d,  $J = 6.8$  Hz, 2H), 7.70 (s, 2H), 7.73 (d,  $J = 8.2$  Hz, 2H);  $^{13}\text{C}$  NMR (75 MHz,  $\text{CDCl}_3$ ):  $\delta$ (ppm): 146.2, 139.6, 133.1, 129.6, 129.1, 128.9, 127.4, 127.1, 118.8, 111.0. MS (m/e)= 179[ $\text{M}^+$ ].[13].

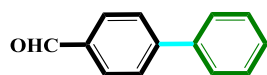

Colorless solid, m.p. 55°C.  $^1\text{H}$  NMR (300 MHz,  $\text{CDCl}_3$ ):  $\delta$  (ppm): 7.28 – 7.34 (m, 3H), 7.52 – 7.59 (m, 2H), 7.65 – 7.69 (m, 2H), 7.98 – 8.04 (m, 2H), 10.08 (s, 1H);  $^{13}\text{C}$  NMR (75 MHz,  $\text{CDCl}_3$ ):  $\delta$ (ppm): 191.6, 192.0, 147.2, 140.0, 135.3, 130.2, 130.0, 128.5, 127.7, 127.3. MS (m/e)= 182[ $\text{M}^+$ ].[14].

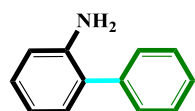

Light brown color solid, m.p. 50°C.  $^1\text{H}$  NMR (300 MHz,  $\text{CDCl}_3$ ):  $\delta$  (ppm): 5.00 (s, br, 2H), 6.73 – 6.82 (m, 2H), 7.28 – 7.50 (m, 5H), 7.50 – 7.66 (m, 2H), 8.59 (m, 1H);  $^{13}\text{C}$  NMR (75 MHz,  $\text{CDCl}_3$ ):  $\delta$ (ppm): 145.7, 132.0, 131.1, 129.4, 128.0, 127.9, 119.6, 122.9, 118.9, 115.1, 94.8, 85.2. MS (m/e)= 169[ $\text{M}^+$ ].[13].

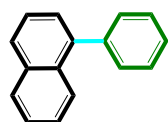

White solid, m.p. 47°C  $^1\text{H}$  NMR (300 MHz,  $\text{CDCl}_3$ ):  $\delta$  (ppm): 7.40 (t,  $J = 7.3$  Hz, 1H), 7.48 – 7.56 (m, 3H), 7.74 – 7.79 (m, 3H), 7.87 – 8.00 (m, 5H);  $^{13}\text{C}$  NMR (75 MHz,  $\text{CDCl}_3$ ):  $\delta$ (ppm): 141.0, 138.4, 128.4, 133.4, 132.6, 128.5, 128.4, 128.1, 128.0, 127.3, 127.1, 127.0, 126.6, 125.9, 125.7, 125.3. MS (m/e)= 204 [M $^+$ ].[15].

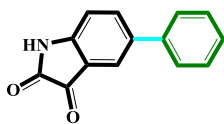

Orange solid; m.p. 153°C.  $^1\text{H}$  NMR (300 MHz,  $\text{CDCl}_3$ ):  $\delta$  (ppm): 7.46 – 7.86 (m, 5H), 8.03 (d,  $J = 8.6$  Hz, 1H), 8.06 (d,  $J = 8.6$  Hz, 1H), 8.62 (s, 1H), 11.21 (d, 1H);  $^{13}\text{C}$  NMR (75 MHz,  $\text{CDCl}_3$ ):  $\delta$ (ppm): 189.7, 162.4, 149.6, 142.6, 139.3, 137.6, 133.5, 129.4, 129.1, 127.6, 127.4, 126.1, 122.9, 118.7. MS (m/e)= 223 [ $\text{M}^+$ ].[16].

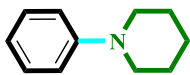

Pale yellow oil.  $^1\text{H}$  NMR (300 MHz,  $\text{CDCl}_3$ ):  $\delta$  (ppm): 1.62 (m, 6H), 3.73 (d,  $J = 5.0$  Hz, 4H), 6.73–6.80 (m, 3H), 7.07 – 7.17 (m, 2H), 6.93 (m, 2H), 7.22 – 7.25 (m, 2H);  $^{13}\text{C}$  NMR (75 MHz,  $\text{CDCl}_3$ ):  $\delta$ (ppm): 150.5, 129.1, 123.6, 114.4, 54.1, 26.5, 24.6. MS (m/e)= 161 [ $\text{M}^+$ ].[17].

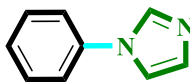

Pale yellow oil.  $^1\text{H}$  NMR (300 MHz,  $\text{CDCl}_3$ ):  $\delta$  (ppm): 7.15 – 7.45 (m, 5H), 7.42 – 7.49 (m, 2H), 7.80 (s, 1H);  $^{13}\text{C}$  NMR (75 MHz,  $\text{CDCl}_3$ ):  $\delta$ (ppm): 137.3, 135.6, 130.5, 29.9, 127.6, 121.5, 118.3. MS (m/e)= 144 [ $\text{M}^+$ ].[18].

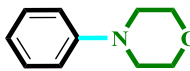

Purple solid. m.p. 52°C.  $^1\text{H}$  NMR (300 MHz,  $\text{CDCl}_3$ ):  $\delta$  (ppm): 3.14 (t,  $J = 4.9$  Hz, 4H), 3.30 (t,  $J = 4.9$  Hz, 4H), 6.60 – 6.67 (m, 3H), 7.27 – 7.31 (m, 2H);  $^{13}\text{C}$  NMR (75 MHz,  $\text{CDCl}_3$ ):  $\delta$ (ppm): 151.2, 129.1, 119.9, 119.9, 115.6, 66.6, 49.2. MS (m/e)= 163 [ $\text{M}^+$ ].[19].

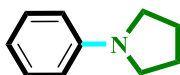

Pale yellow oil. m.p. 5°C.  $^1\text{H}$  NMR (300 MHz,  $\text{CDCl}_3$ ):  $\delta$  (ppm): 2.05 (t,  $J = 12.9$  Hz, 4H), 3.27 (t,  $J = 10.2$  Hz, 4H), 6.55 (d,  $J = 8.1$  Hz, 2H), 6.65 (t,  $J = 7.3$  Hz, 1H), 7.20 – 7.25 (m, 2H);  $^{13}\text{C}$  NMR (75 MHz,  $\text{CDCl}_3$ ):  $\delta$ (ppm): 150.7, 130.0, 121.8, 114.7, 51.3, 25.0. MS (m/e)= 147 [ $\text{M}^+$ ].[20].

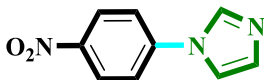

Light brown solid, m.p. 201°C.  $^1\text{H}$  NMR (300 MHz,  $\text{CDCl}_3$ ):  $\delta$  (ppm): 7.21 (d,  $J = 7.7$  Hz, 1H), 7.32 (d,  $J = 7.7$  Hz, 1H), 7.52 (d,  $J = 7.5$  Hz, 2H), 7.93 (s, 1H), 8.30 – 8.34 (m, 2H);  $^{13}\text{C}$  NMR (75 MHz,  $\text{CDCl}_3$ ):  $\delta$ (ppm): 147.4, 143.7, 136.2, 130.2, 126.0, 118.6. MS (m/e)= 189 [ $\text{M}^+$ ].[21].



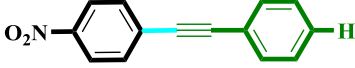 O=[N+]([O-])c1ccc(cc1)C#Cc2ccc(cc2)H Yellow solid, m.p. 111°C. <sup>1</sup>H NMR (300 MHz, CDCl<sub>3</sub>): δ (ppm): 6.66 – 7.41 (m, 3H), 7.54 – 7.69 (m, 4H), 8.22 (d, *J* = 7.7 Hz, 2H); <sup>13</sup>C NMR (75 MHz, CDCl<sub>3</sub>): δ(ppm): 147.0, 132.3, 132.0, 132.2, 129.7, 128.6, 123.8, 122.0, 94.8, 87.5. MS (m/e)= 223 [M<sup>+</sup>].[\[22\]](#).

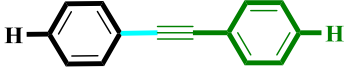 C#Cc1ccc(cc1)-c2ccc(cc2)H White solid, m.p. 59°C. <sup>1</sup>H NMR (300 MHz, CDCl<sub>3</sub>): δ (ppm): 6.93 – 7.28 (m, 5H), 7.44 – 7.98 (m, 5H); <sup>13</sup>C NMR (75 MHz, CDCl<sub>3</sub>): δ(ppm): 131.5, 129.3, 128.8, 128.5, 128.3, 127.7, 126.5, 123.4, 89.5. MS (m/e)= 178 [M<sup>+</sup>].[\[23\]](#).

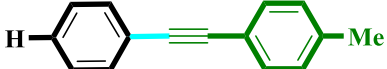 C#Cc1ccc(cc1)-c2ccc(cc2)C Colorless solid, m.p. 71°C. <sup>1</sup>H NMR (300 MHz, CDCl<sub>3</sub>): δ (ppm): 2.22 (s, 3H), 7.14 (d, *J* = 8.4 Hz, 2H), 7.19 – 7.42 (m, 7H); <sup>13</sup>C NMR (75 MHz, CDCl<sub>3</sub>): δ(ppm): 138.4, 131.6, 131.5, 129.4, 128.6, 128.1, 123.5, 120.2, 89.5, 88.7, 21.5. MS (m/e)= 192 [M<sup>+</sup>].[\[23\]](#).

## REFERENCES

- [1] Zhang, J. Q., Cao, J., Li, W., Li, S. M., Li, Y. K., Wang, J. T., & Tang, L. (2017). Palladium/copper-catalyzed arylation of alkenes with N'-acyl arylhydrazines. *New Journal of Chemistry*, *41*(2), 437-441.
- [2] Puthiaraj, P., & Pitchumani, K. (2014). Palladium nanoparticles supported on triazine functionalised mesoporous covalent organic polymers as efficient catalysts for Mizoroki–Heck cross coupling reaction. *Green Chemistry*, *16*(9), 4223-4233.
- [3] Shen, C., Shen, H., Yang, M., Xia, C., & Zhang, P. (2015). A novel D-glucosamine-derived pyridyl-triazole@ palladium catalyst for solvent-free Mizoroki–Heck reactions and its application in the synthesis of Axitinib. *Green Chemistry*, *17*(1), 225-230.
- [4] Sun, P., Zhu, Y., Yang, H., Yan, H., Lu, L., Zhang, X., & Mao, J. (2012). The ligand and base-free Pd-catalyzed oxidative Heck reaction of arylboronic acids and olefins. *Organic & biomolecular chemistry*, *10*(23), 4512-4515.
- [5] Liu, X., Zhao, X., Zhu, J., & Xu, J. (2016). One-pot synthesis of magnetic palladium–NiFe<sub>2</sub>O<sub>4</sub>–graphene oxide composite: an efficient and recyclable catalyst for Heck reaction. *Applied Organometallic Chemistry*, *30*(5), 354-359.
- [6] Kazemnejadi, M., Alavi, S. A., Rezazadeh, Z., Nasserli, M. A., Allahresani, A., & Esmaeilpour, M. (2019). Imidazolium chloride-Co (iii) complex immobilized on Fe<sub>3</sub>O<sub>4</sub>@ SiO<sub>2</sub> as a highly active bifunctional nanocatalyst for the copper-, phosphine-, and base-free Heck and Sonogashira reactions. *Green Chemistry*, *21*(7), 1718-1734.
- [7] Wang, Y., & Zhang, M. (2019). Schiff Base/CuI as a Novel Efficient Catalyst System for Cu–Catalyzed Heck Reaction in Water. *ChemistrySelect*, *4*(33), 9673-9676.
- [8] Mao, S. L., Sun, Y., Yu, G. A., Zhao, C., Han, Z. J., Yuan, J., ... & Liu, S. H. (2012). A highly active catalytic system for Suzuki–Miyaura cross-coupling reactions of aryl and heteroaryl chlorides in water. *Organic & biomolecular chemistry*, *10*(47), 9410-9417.
- [9] Liu, X., Mao, Y., & Lu, M. (2012). Complex of [BMIm] PF<sub>6</sub> with PEG1000: a high efficient and recycle system for palladium-catalyzed Suzuki cross-coupling and Heck reaction. *Applied Organometallic Chemistry*, *26*(6), 305-309.
- [10] Cheng, S., Wei, W., Zhang, X., Yu, H., Huang, M., & Kazemnejadi, M. (2020). A new approach to large scale production of dimethyl sulfone: a promising and strong recyclable solvent for ligand-free Cu-catalyzed C–C cross-coupling reactions. *Green Chemistry*, *22*(6), 2069-2076.
- [11] Liu, K. M., Zhang, R., & Duan, X. F. (2016). Room-temperature cobalt-catalyzed arylation of aromatic acids: overriding the ortho-selectivity via the oxidative assembly of carboxylate and aryl titanate reagents using oxygen. *Organic & biomolecular chemistry*, *14*(5), 1593-1598.
- [12] Keesara, S., & Parvathaneni, S. (2016). A 2-((4-Arylpiperazin-1-yl) methyl) phenol ligated Pd (ii) complex: an efficient, versatile catalyst for Suzuki–Miyaura cross-coupling reactions. *New Journal of Chemistry*, *40*(9), 7596-7603.
- [13] Kohzadi, H., & Soleiman-Beigi, M. (2020). A recyclable heterogeneous nanocatalyst of copper-grafted natural asphalt sulfonate (NAS@ Cu): characterization, synthesis and application in the Suzuki–Miyaura coupling reaction. *New Journal of Chemistry*, *44*(28), 12134-12142.
- [14] Zhang, Y., Jiang, X., Wang, J. M., Chen, J. L., & Zhu, Y. M. (2015). Palladium-catalyzed synthesis of aldehydes from aryl halides and tert-butyl isocyanide using formate salts as hydride donors. *RSC Advances*, *5*(22), 17060-17063.
- [15] Taherpour, A. A., Taban, S., & Yari, A. (2015). One-pot Solvent-free Catalytic Dimerization Reaction of Phenylacetylene to 1-Phenylnaphthalene. *Journal of Chemical Sciences*, *127*(9), 1523-1530.
- [16] Zhao, D., Wang, P., Xu, T., Wu, J., Wang, J., & Xu, S. (2016, March). Synthesis of 5-Substituted Indole-2, 3-dione. In *2016 4th International Conference on Machinery, Materials and Computing Technology* (pp. 776-779). Atlantis Press.

- [17] Kumar, Atul, and Ajay Kumar Bishnoi. "Application of nanoparticle mediated N-arylation of amines for the synthesis of pharmaceutical entities using vit-E analogues as amphiphiles in water." *RSC advances* 5.26 (2015): 20516-20520.
- [18] Nasser, M. A., Rezazadeh, Z., Kazemnejadi, M., & Allahresani, A. (2020). A Co–Cu bimetallic magnetic nanocatalyst with synergistic and bifunctional performance for the base-free Suzuki, Sonogashira, and C–N cross-coupling reactions in water. *Dalton Transactions*, 49(30), 10645-10660.
- [19] Yong, F. F., & Teo, Y. C. (2010). Manganese-catalyzed cross-coupling reactions of aliphatic amines with aryl halides. *Tetrahedron Letters*, 51(30), 3910-3912.
- [20] Wang, D., Zhang, F., Kuang, D., Yu, J., & Li, J. (2012). A highly efficient Cu-catalyst system for N-arylation of azoles in water. *Green Chemistry*, 14(5), 1268-1271.
- [21] Nasser, M. A., Alavi, S. A., Kazemnejadi, M., & Allahresani, A. (2020). Chiral Mn (III) Salen Complex Immobilized on CuFe<sub>2</sub>O<sub>4</sub>@ SiO<sub>2</sub>-NH<sub>2</sub> NPs: A Cheap and Efficient Catalyst for N-arylation of Aryl Halides and Phenylboronic Acid Under Mild Conditions. *Letters in Organic Chemistry*, 17(11), 857-863.
- [22] Boyarskii, V. P. (2017). Sonogashira reaction catalyzed by palladium isocyanide complex modified in situ. *Russian Journal of General Chemistry*, 87(8), 1663-1666.
- [23] Nasser, M. A., Alavi, S. A., Kazemnejadi, M., & Allahresani, A. (2019). The CuFe<sub>2</sub>O<sub>4</sub>@ SiO<sub>2</sub>@ ZrO<sub>2</sub>/SO<sub>4</sub><sup>2-</sup>/Cu nanoparticles: an efficient magnetically recyclable multifunctional Lewis/Brønsted acid nanocatalyst for the ligand-and Pd-free Sonogashira cross-coupling reaction in water. *RSC Advances*, 9(36), 20749-20759.

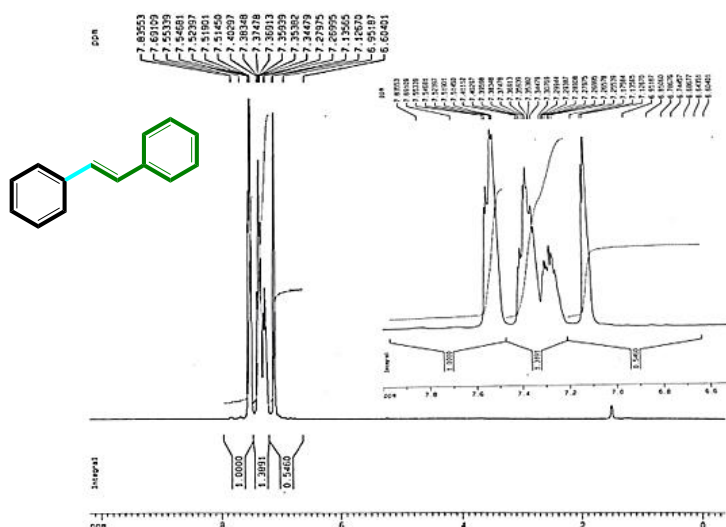

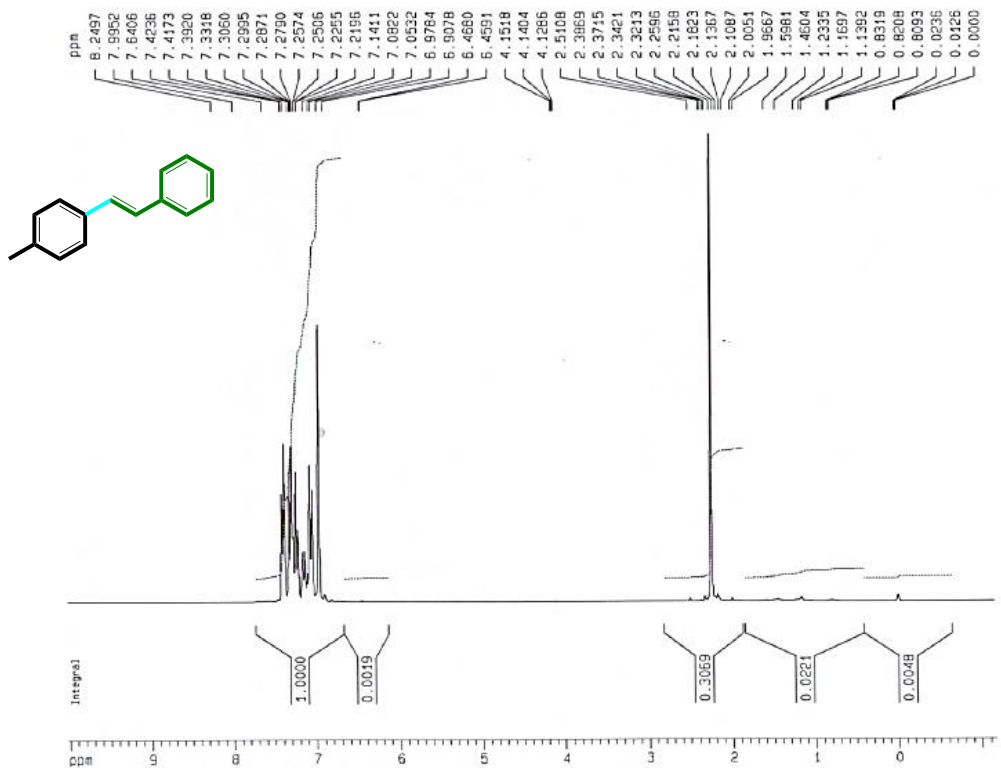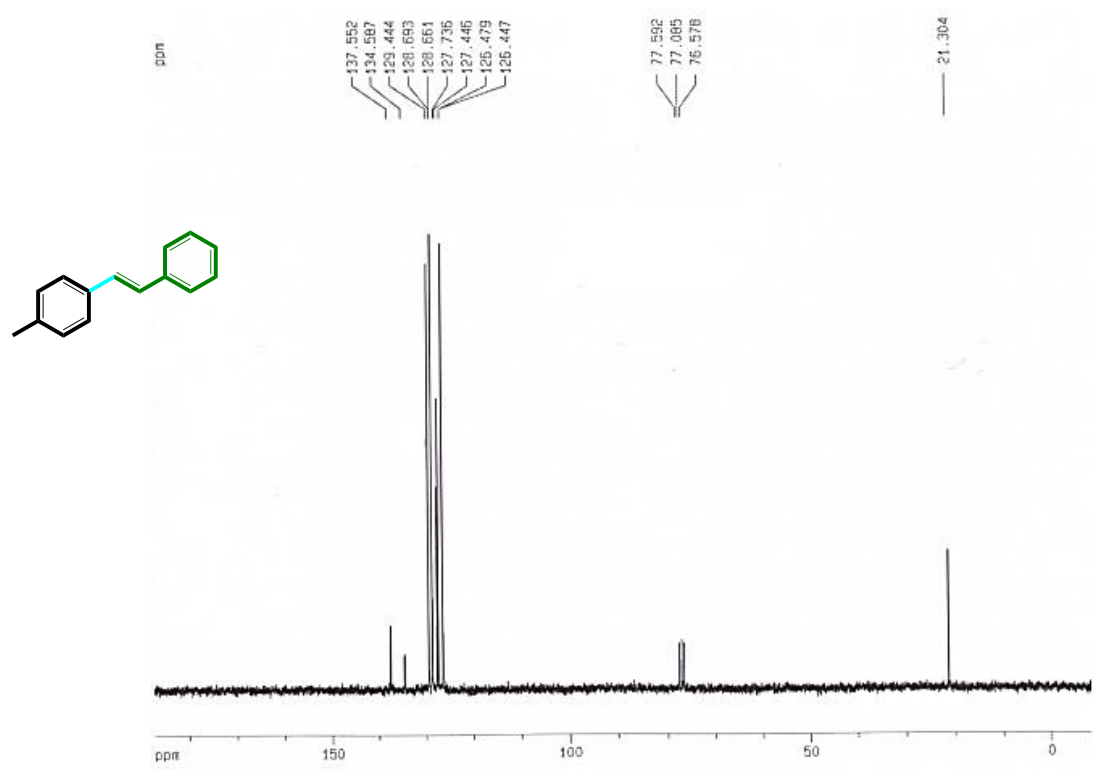

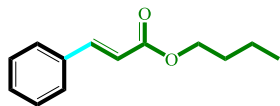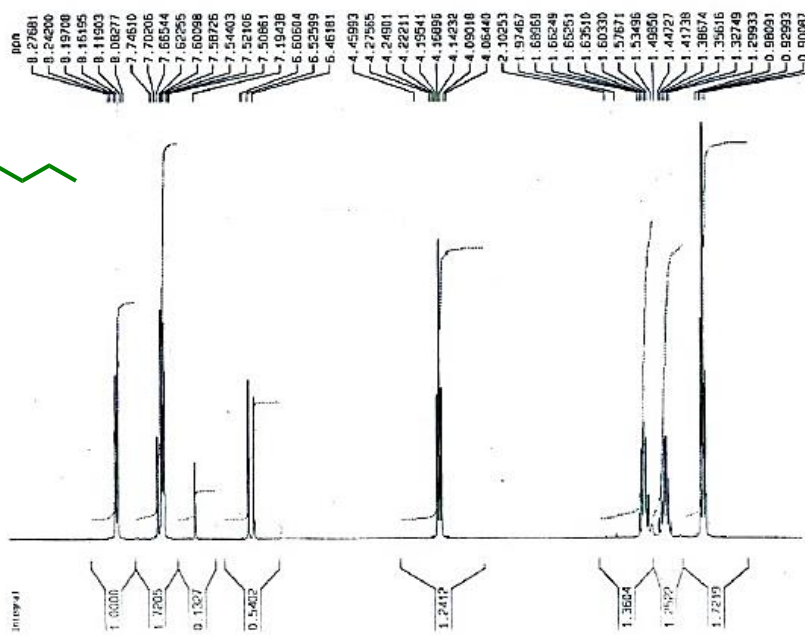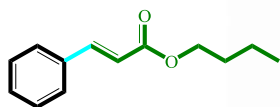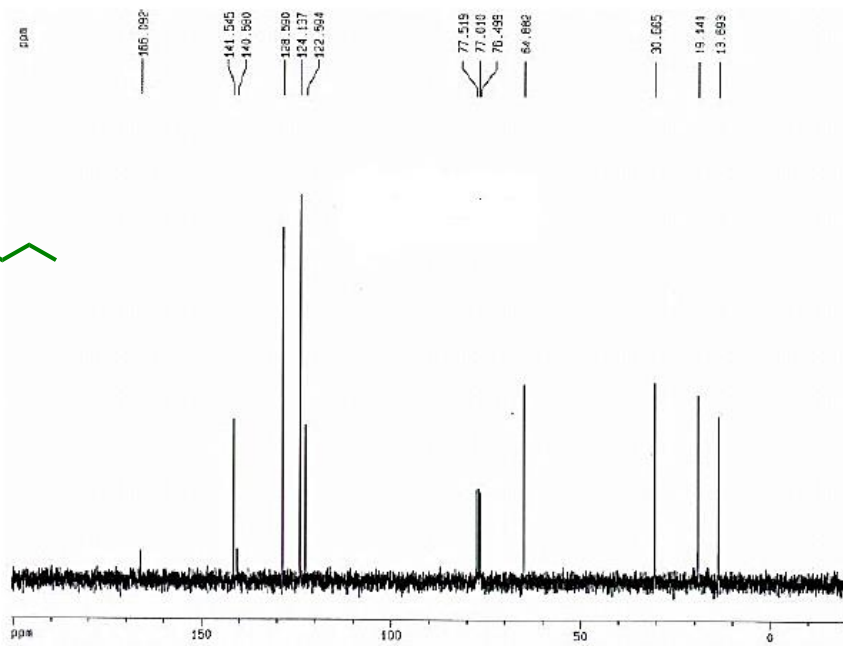

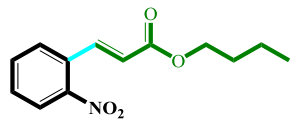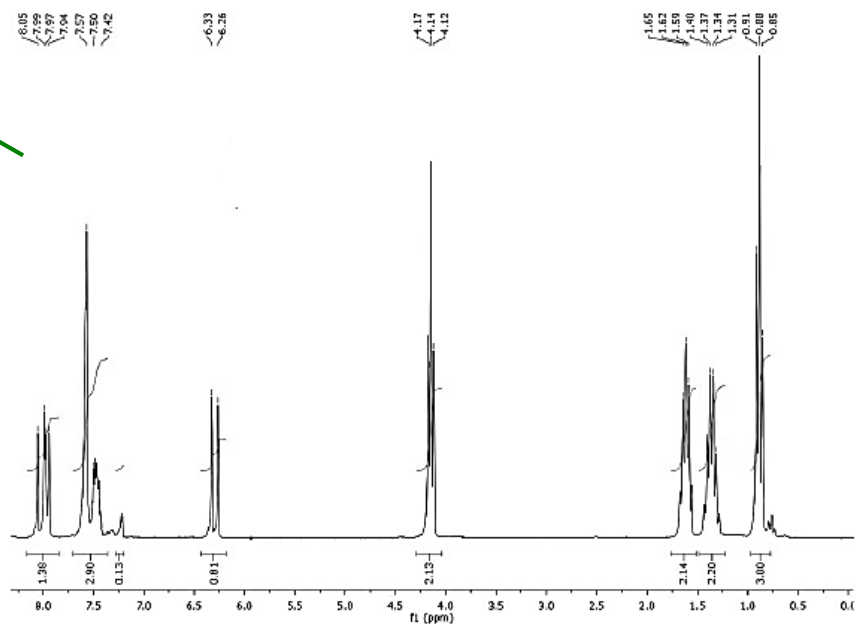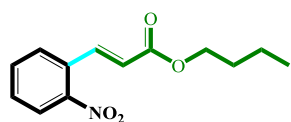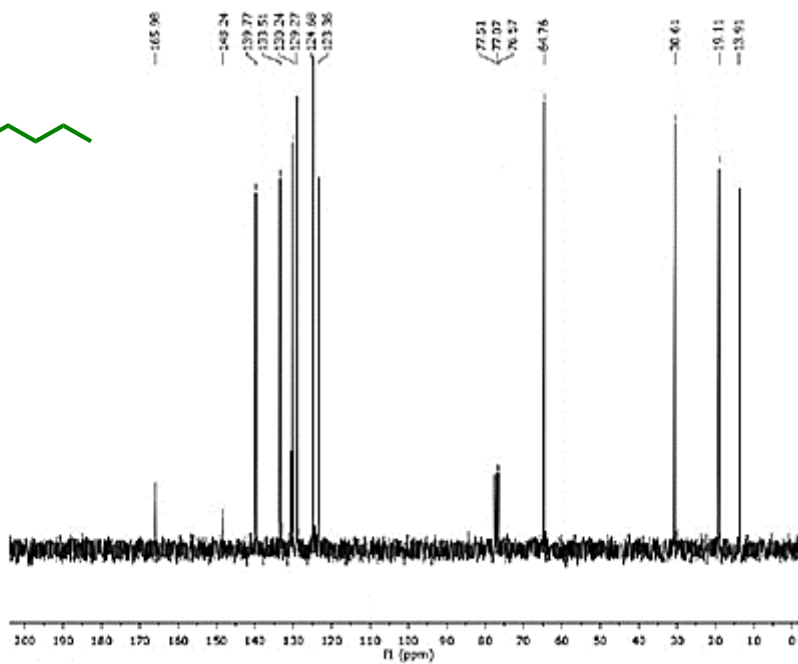

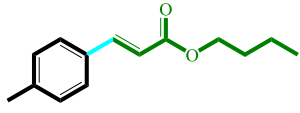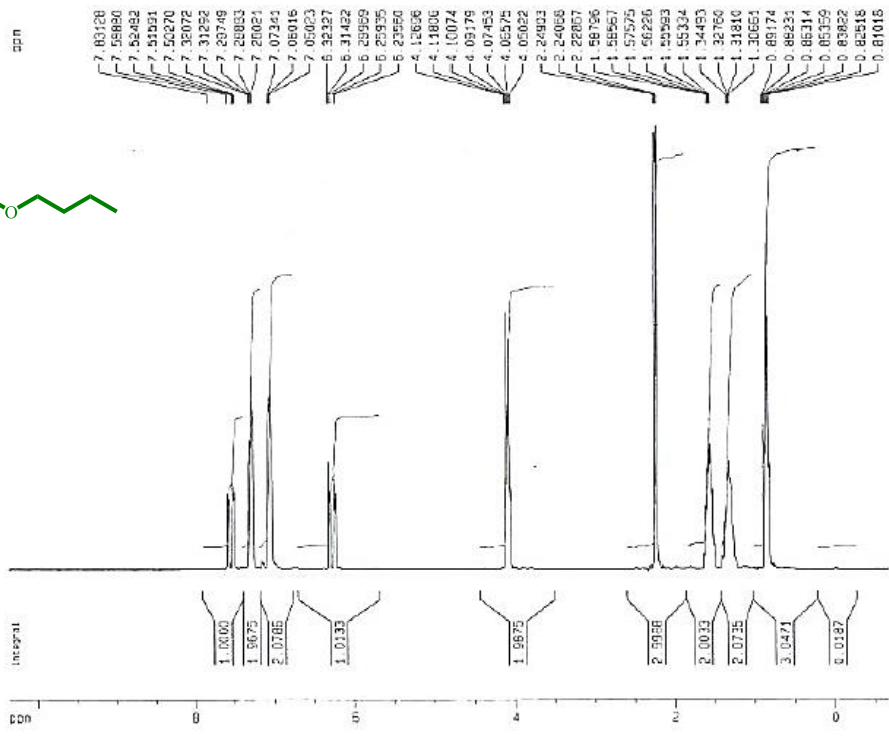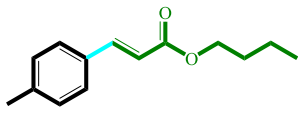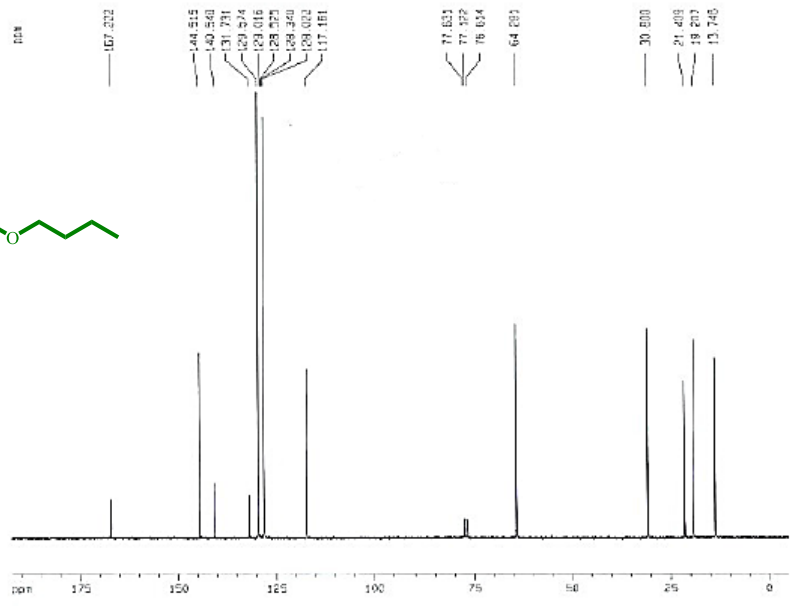

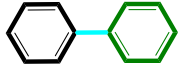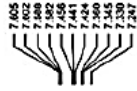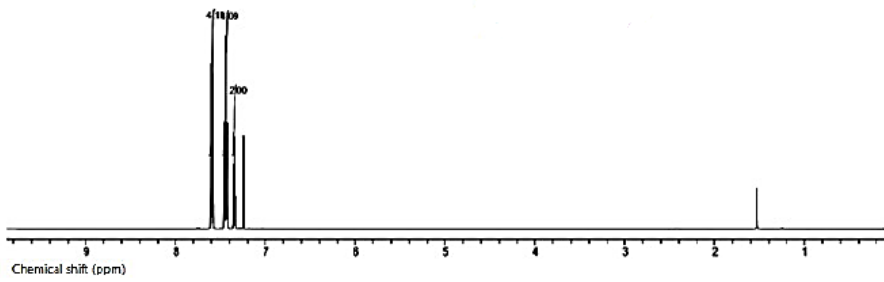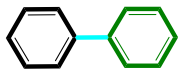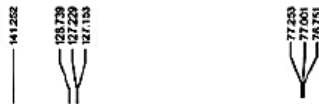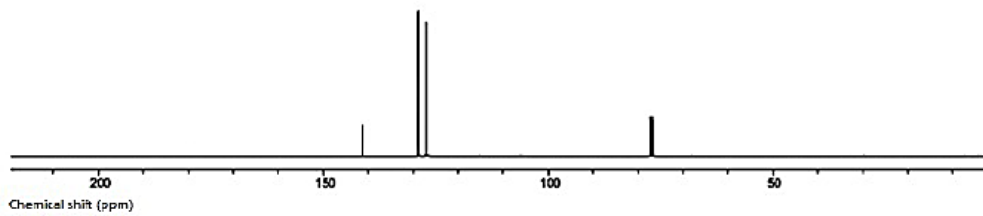



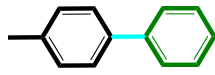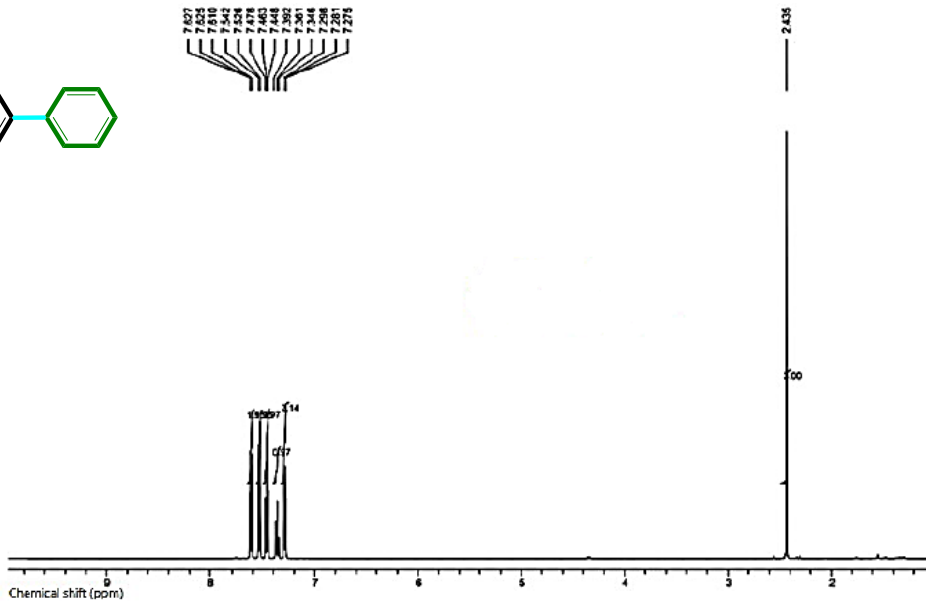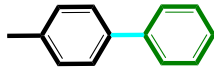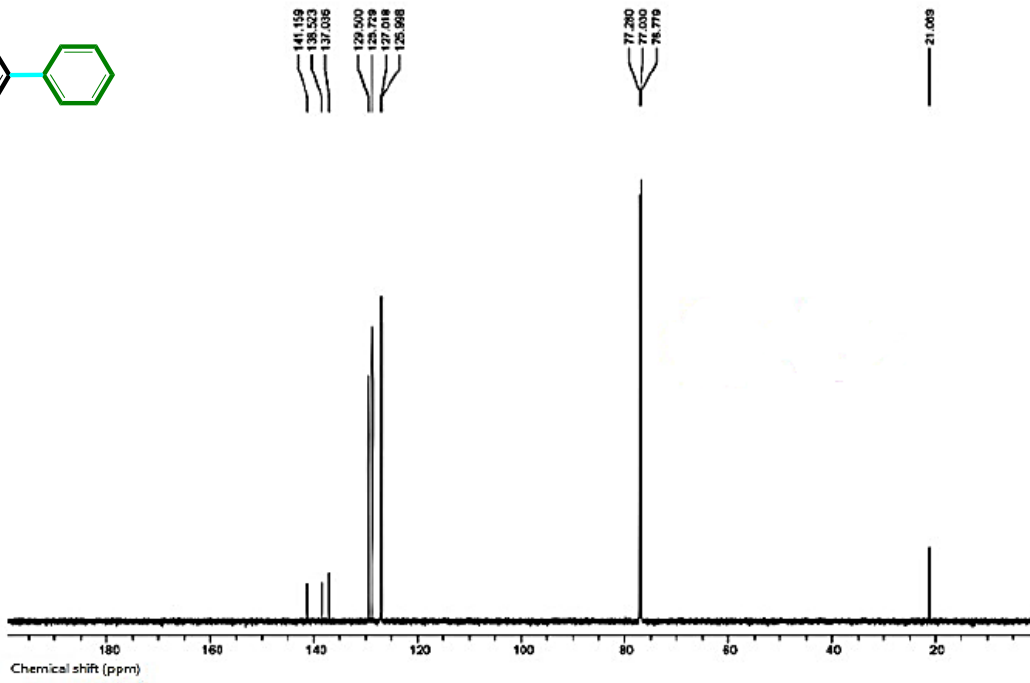

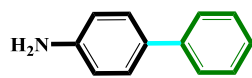

7.37  
7.37  
7.36  
7.36  
7.35  
7.35  
7.34  
7.34  
7.32  
7.32  
7.29

3.94

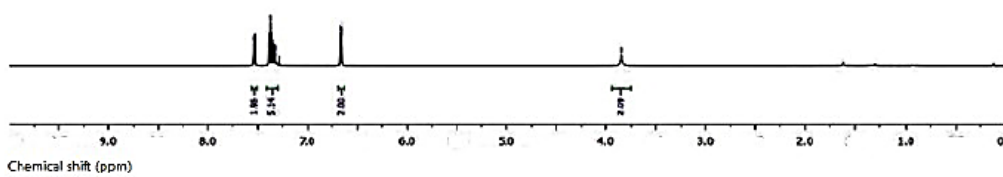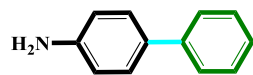

146.44

133.87  
131.36  
127.84

131.81

114.78  
112.45

40.11  
37.33

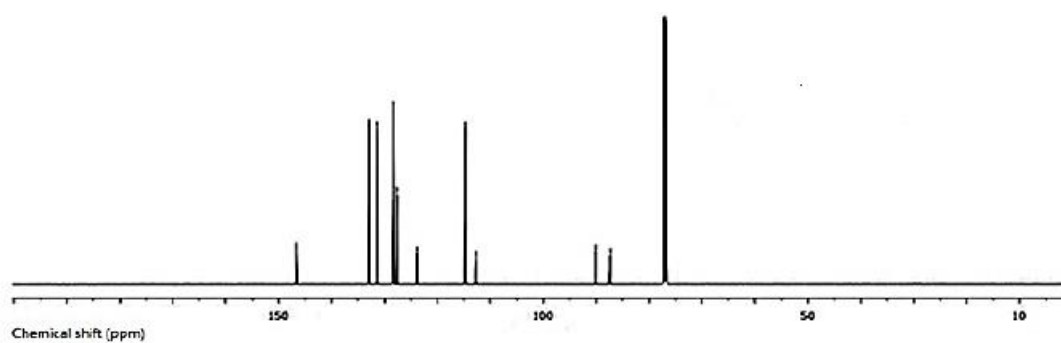

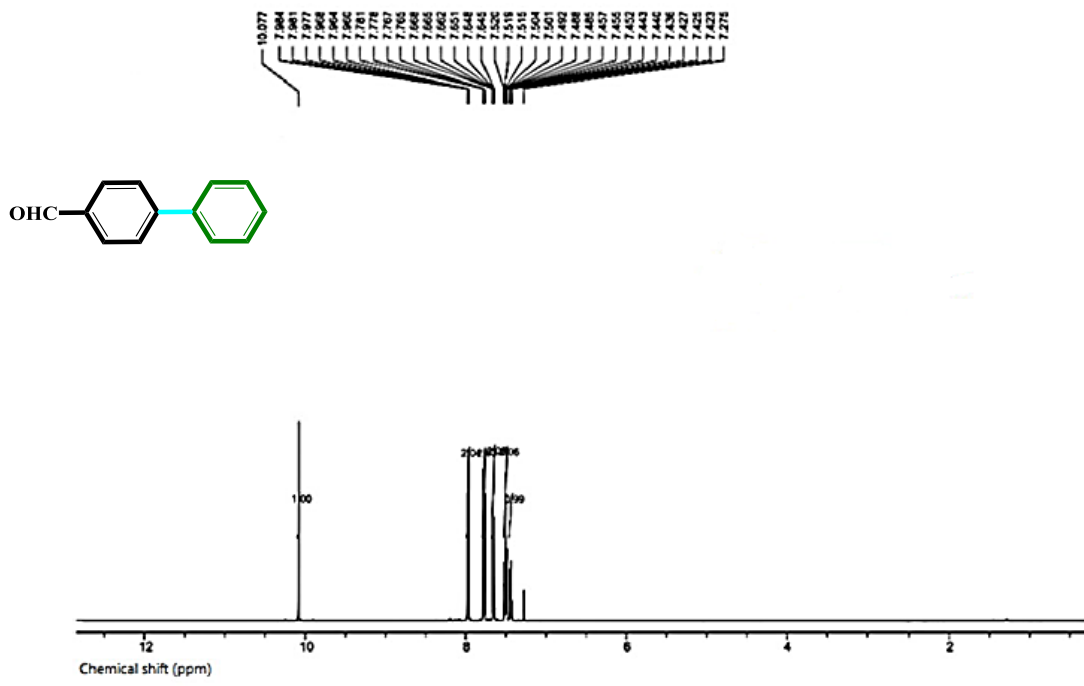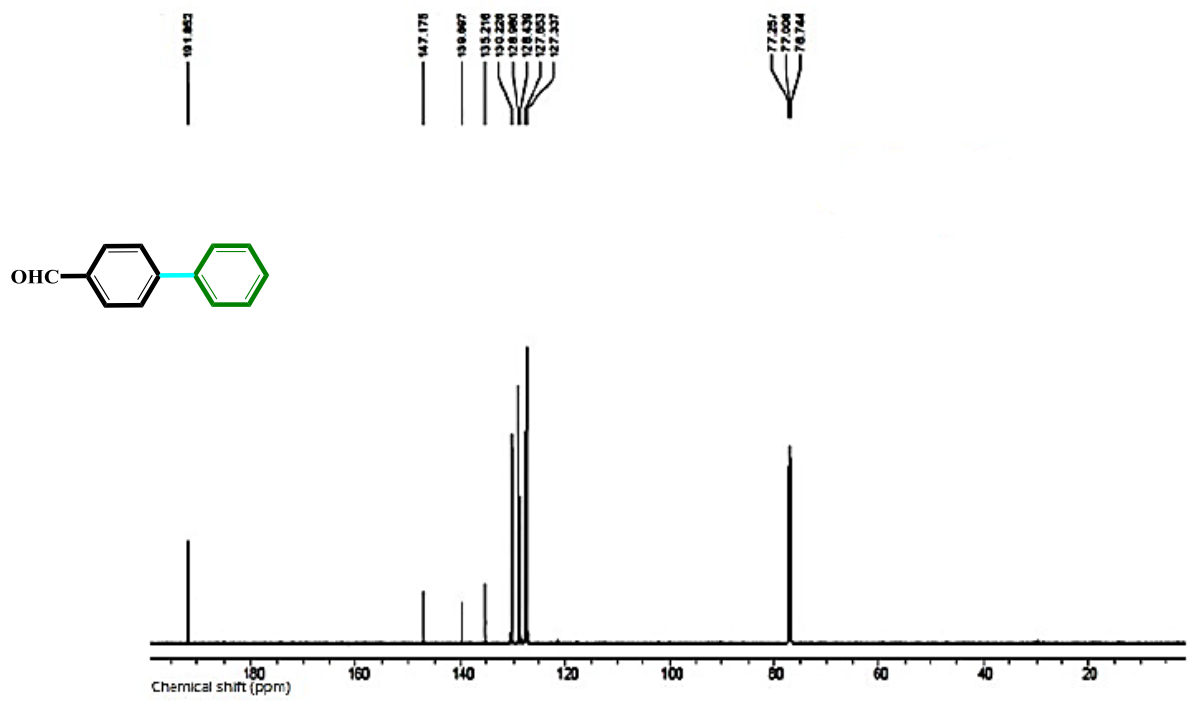

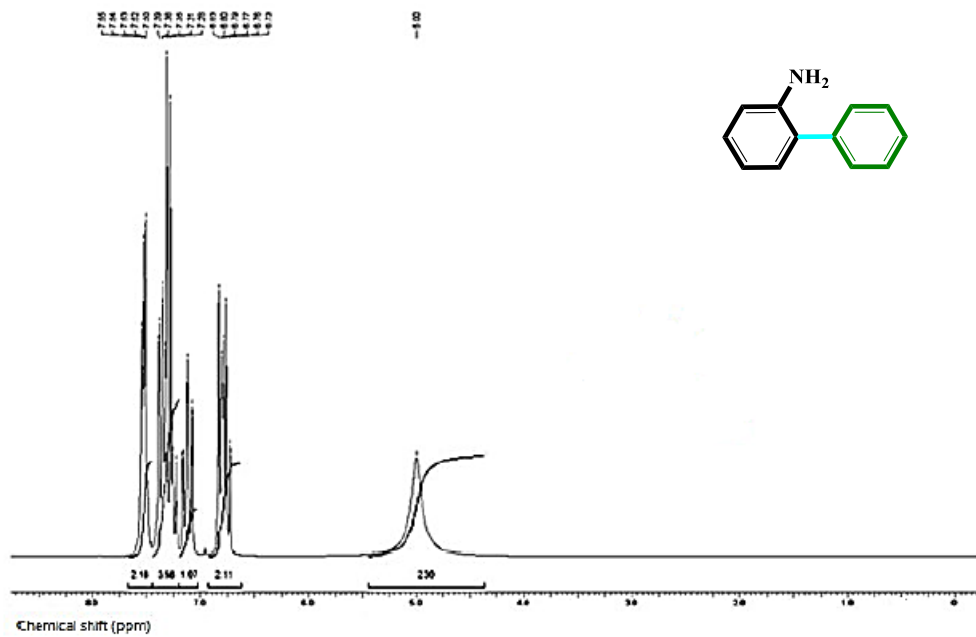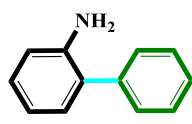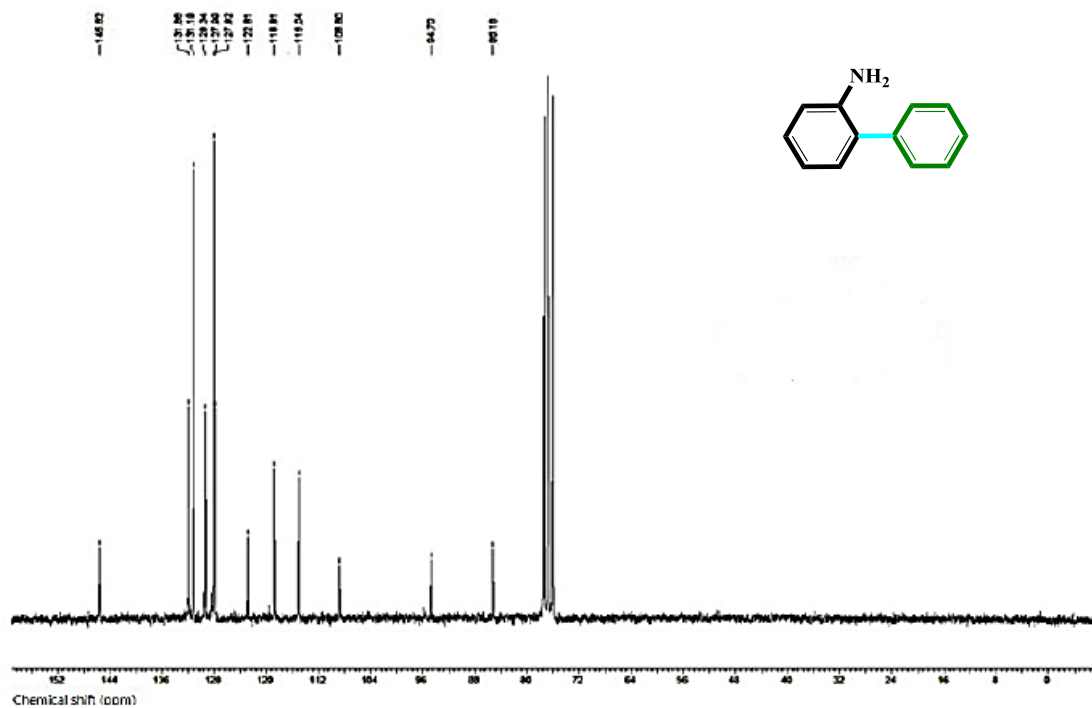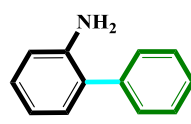

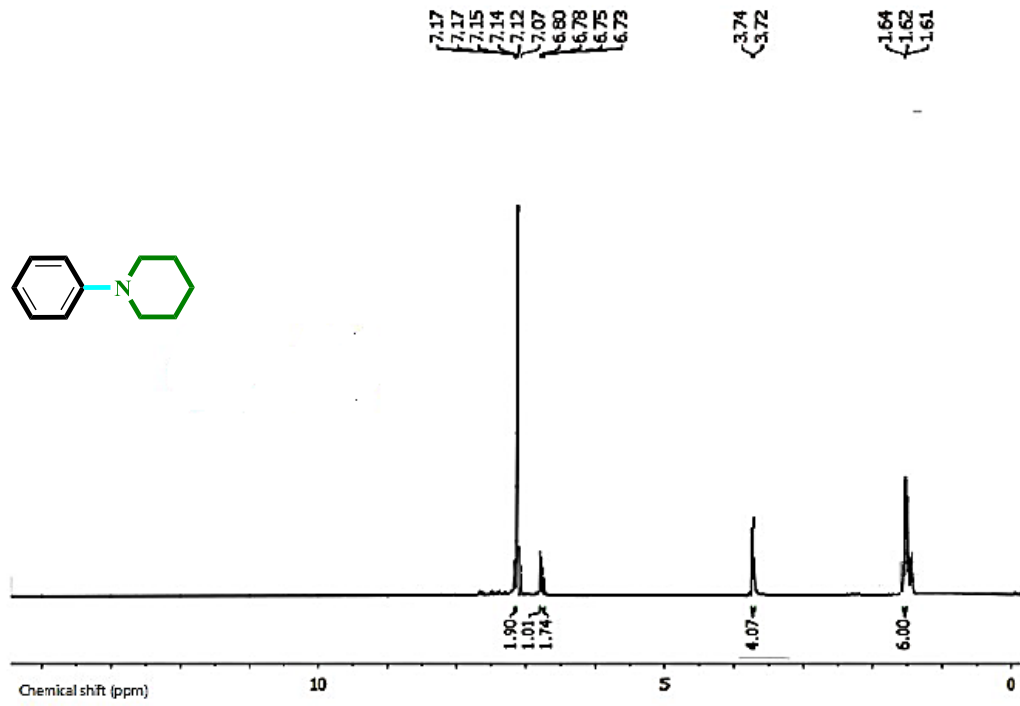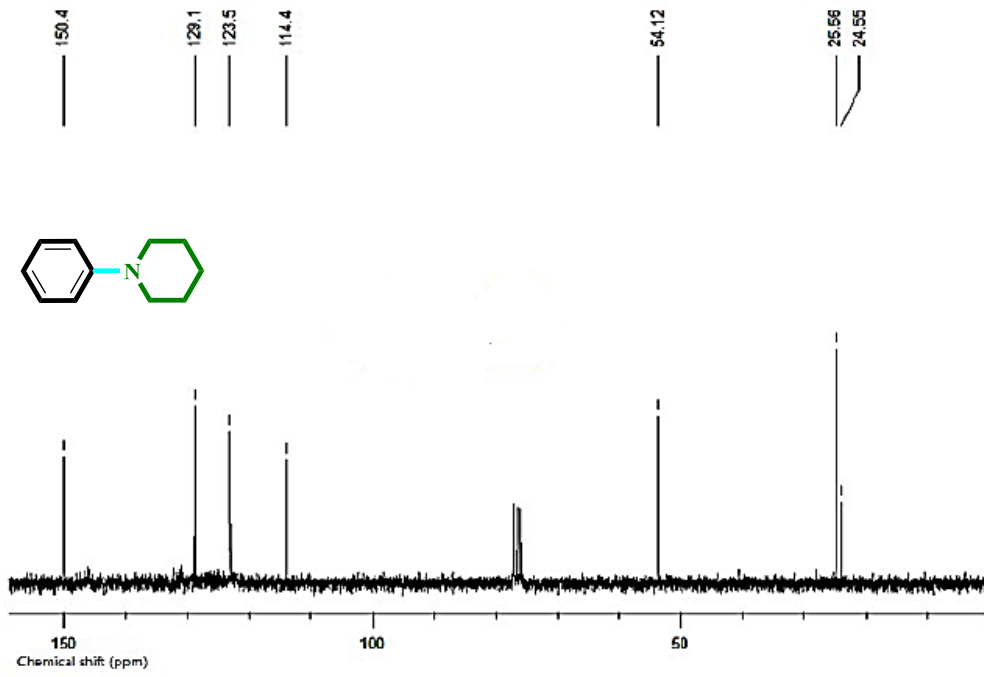

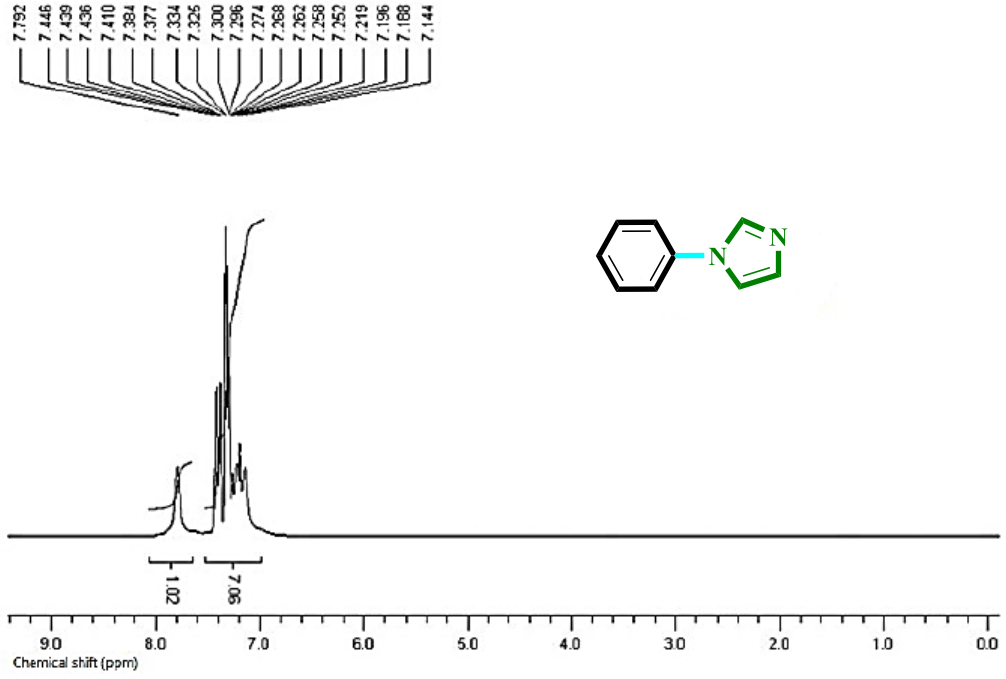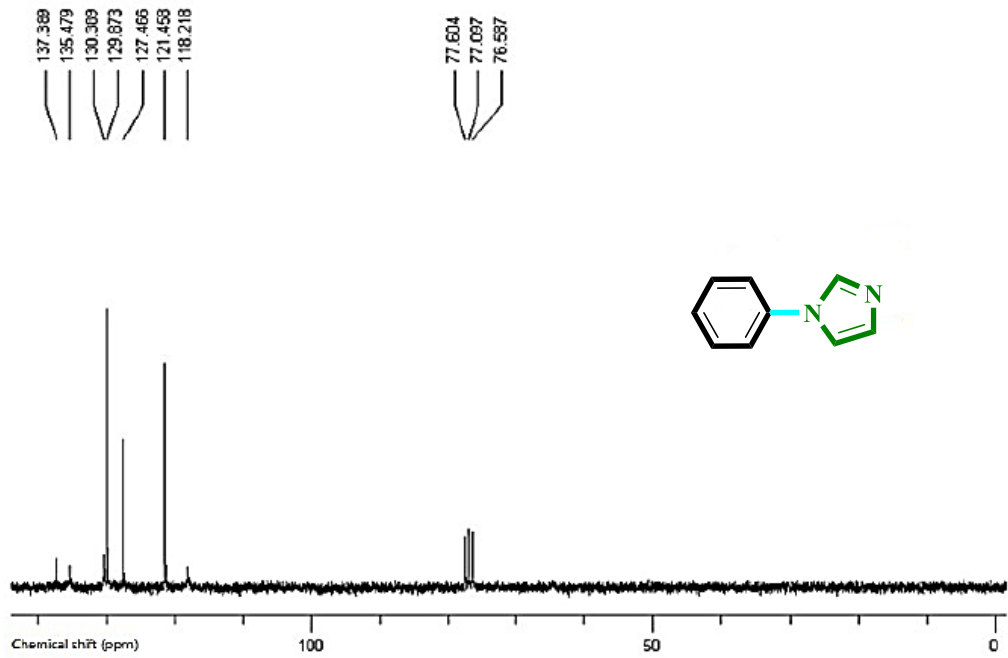

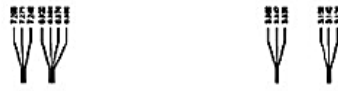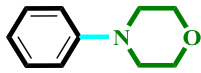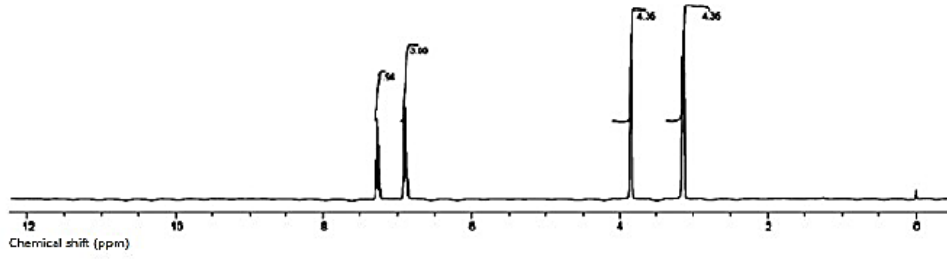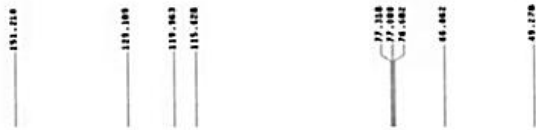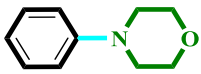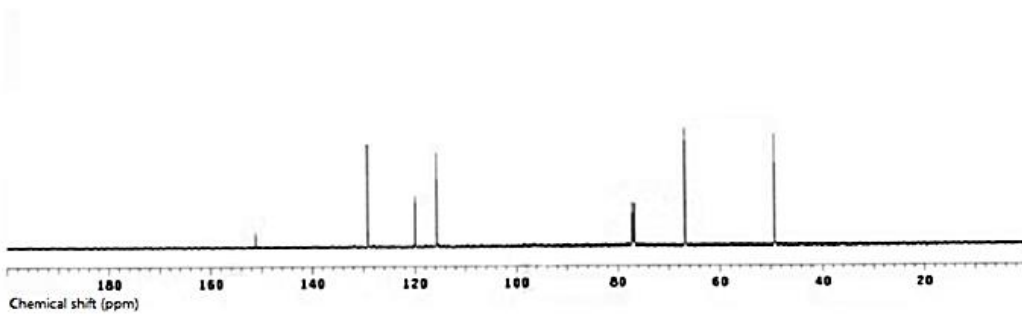

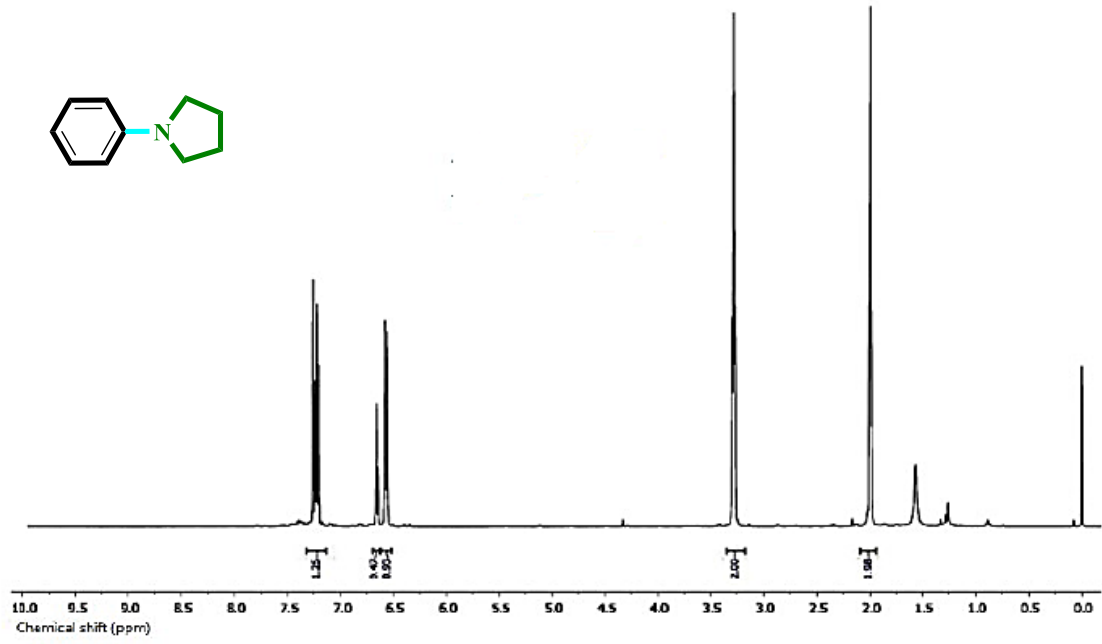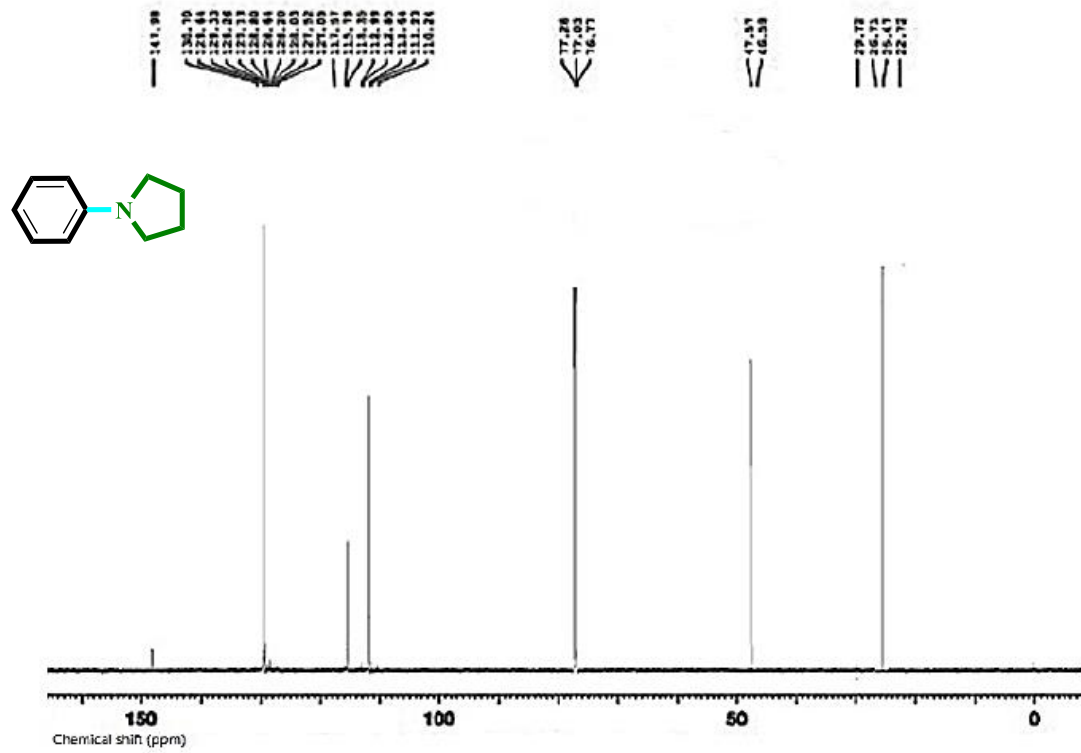



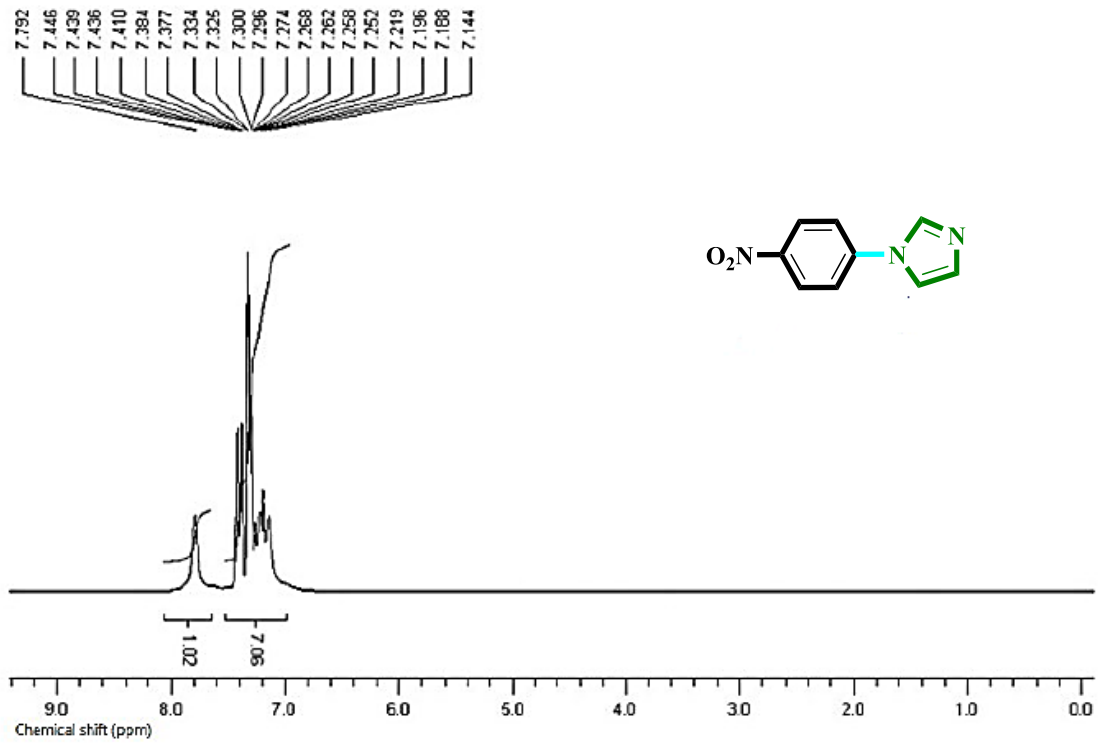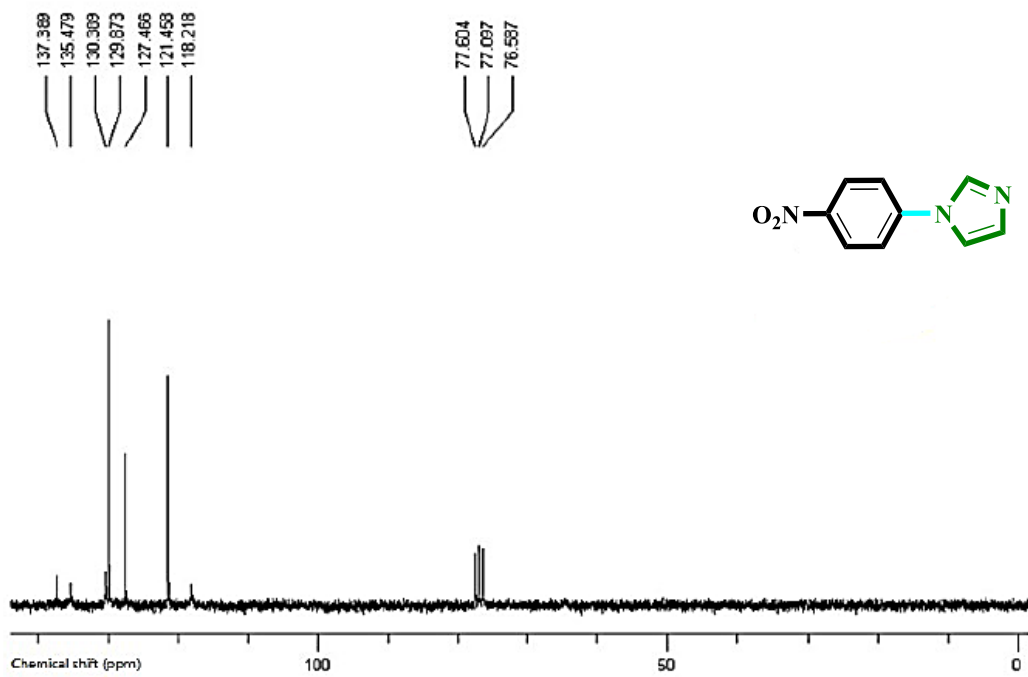

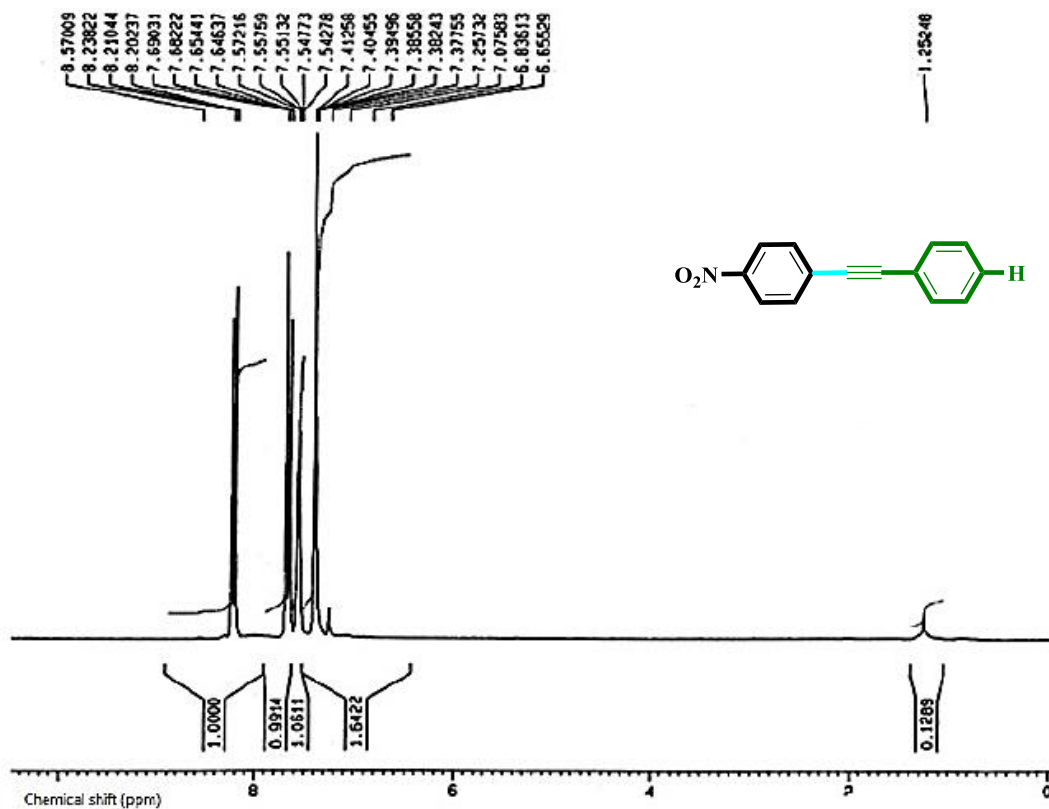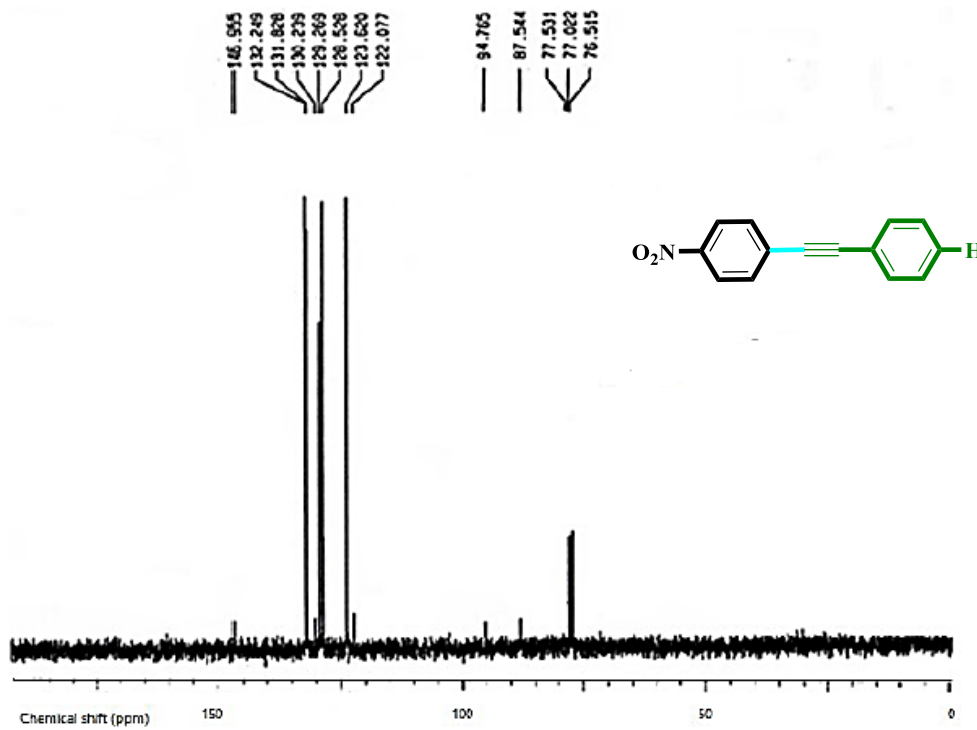

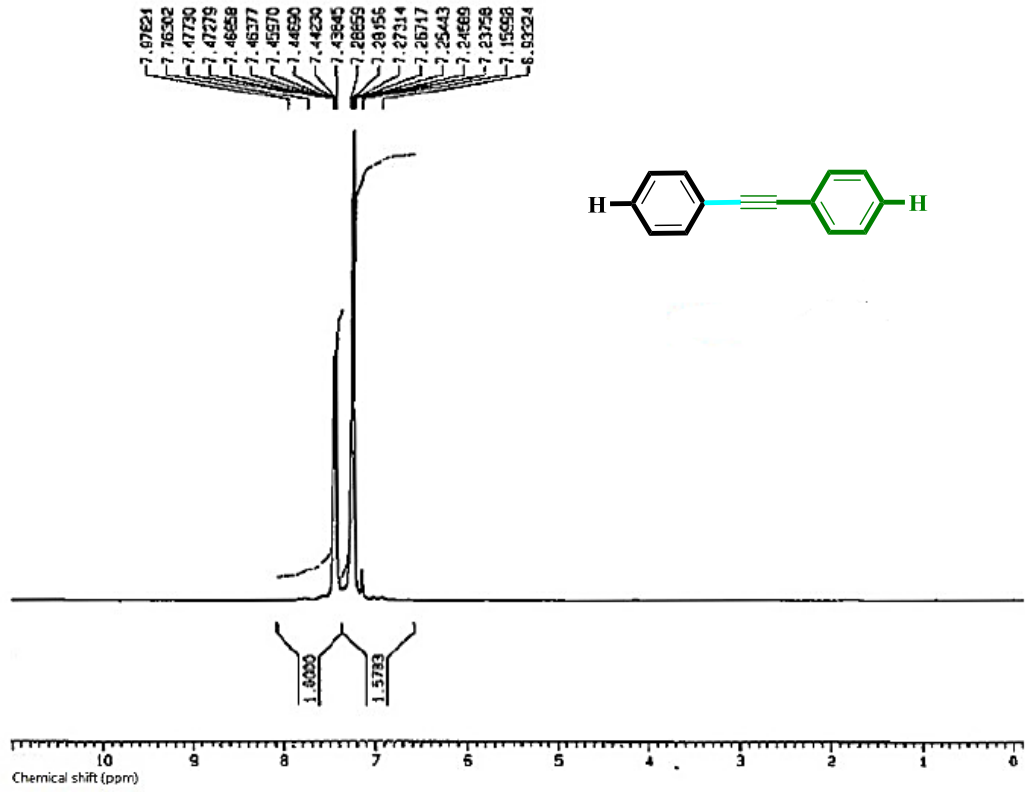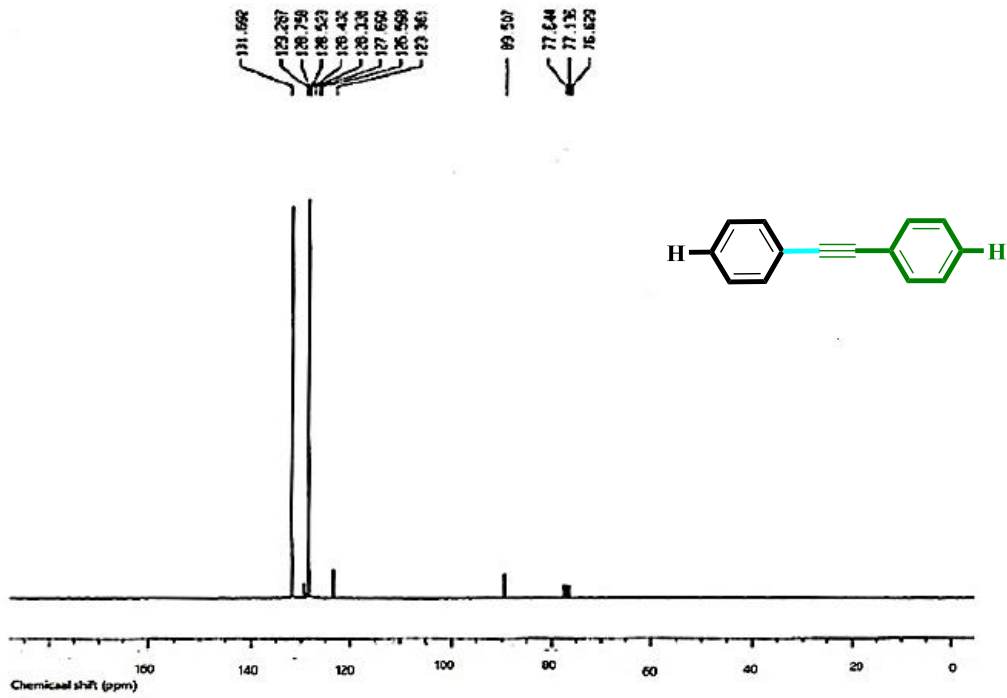

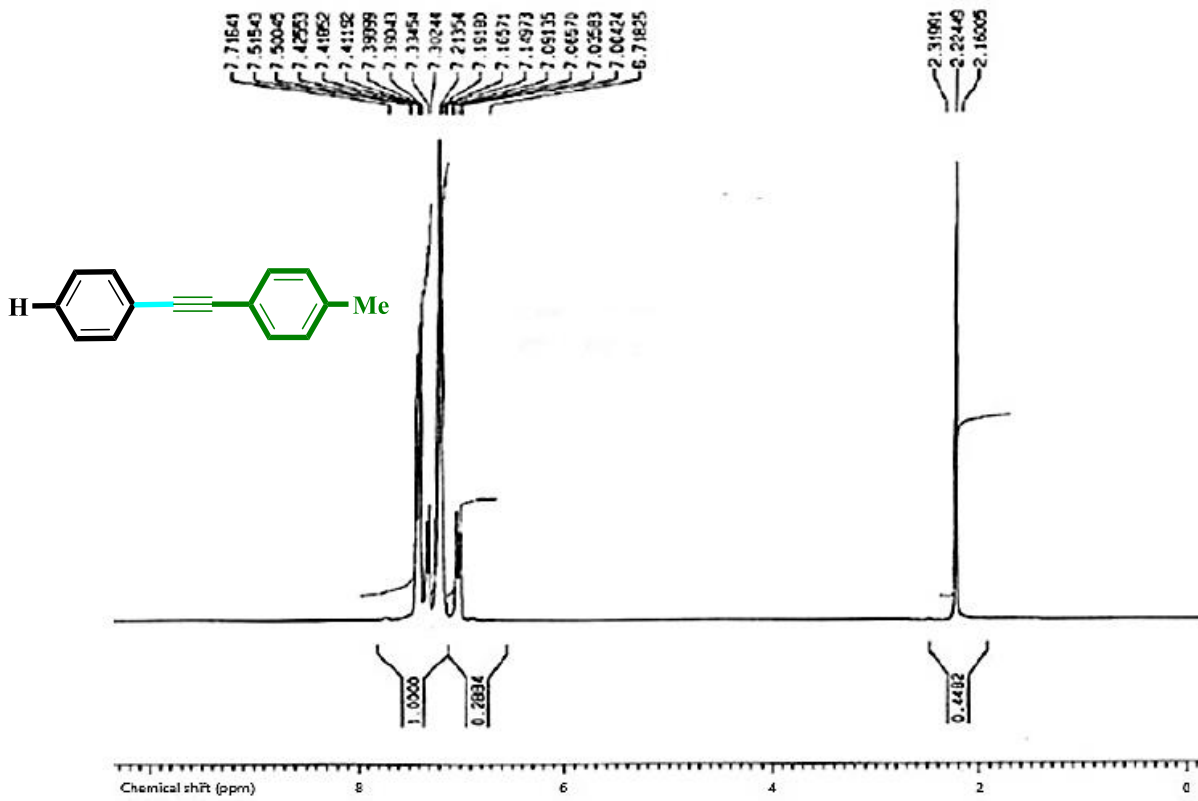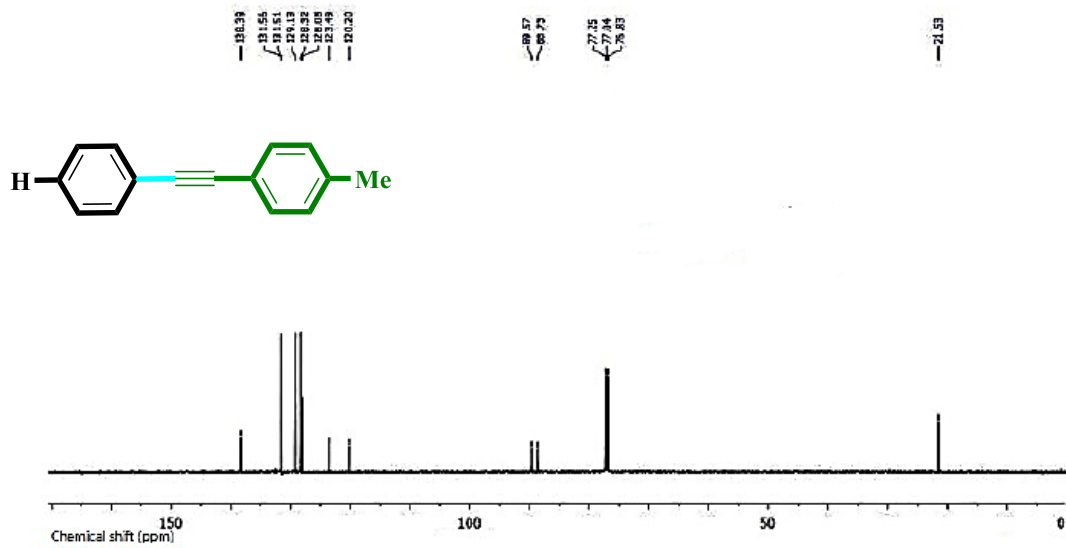

Supplement: d0nj06208a1.pdf [file d0nj06208a1.pdf]
